# 1 Fast and robust animal pose 2 estimation

3 **Jacob M. Graving**<sup>1,2,3,\*</sup>, **Daniel Chae**<sup>4</sup>, **Hemal Naik**<sup>1,2,3,5</sup>, **Liang Li**<sup>1,2,3</sup>, **Benjamin**  
4 **Koger**<sup>1,2,3</sup>, **Blair R. Costelloe**<sup>1,2,3</sup>, **Iain D. Couzin**<sup>1,2,3,\*</sup>

\*For correspondence:  
[jgraving@gmail.com](mailto:jgraving@gmail.com);  
[icouzin@orn.mpg.de](mailto:icouzin@orn.mpg.de)

5 <sup>1</sup>Department of Collective Behaviour, Max Planck Institute for Ornithology, 78464  
6 Konstanz, Germany; <sup>2</sup>Chair of Biodiversity and Collective Behaviour, University of  
7 Konstanz, 78464 Konstanz, Germany; <sup>3</sup>Centre for the Advanced Study of Collective  
8 Behaviour, University of Konstanz, 78464 Konstanz, Germany; <sup>4</sup>Department of Computer  
9 Science, Princeton University, 08544 Princeton, NJ, USA; <sup>5</sup>Chair for Computer Aided  
10 Medical Procedures, Technische Universität München, 80333 Munich, Germany

---

12 **Abstract** Quantitative behavioral measurements are important for answering questions across  
13 scientific disciplines—from neuroscience to ecology. State-of-the-art deep-learning-based methods  
14 offer major advances in data quality and detail by allowing researchers to automatically estimate  
15 locations of an animal's body parts directly from images or videos. However, currently-available  
16 animal pose estimation methods have limitations in speed, robustness, and usability. Here we  
17 introduce an open-source software toolkit, *DeepPoseKit*, that addresses these problems. Using  
18 modern desktop hardware, our methods perform real-time measurements at ~30–110-Hz with  
19 offline performance >1000-Hz—approximately 2–6× faster than current methods. We achieve  
20 these results while only increasing average error <0.5-pixels compared to the most-accurate  
21 methods currently available. We demonstrate the versatility of our approach with multiple  
22 challenging animal pose estimation tasks in laboratory and field settings—including groups of  
23 interacting individuals. Our work reduces barriers to using advanced tools for measuring behavior  
24 and has broad applicability across the behavioral sciences.

---

## 26 Introduction

27 Understanding the relationships between individual behavior, brain activity (reviewed by *Krakauer*  
28 *et al.* 2017), and collective and social behaviors (*Rosenthal et al.*, 2015; *Strandburg-Peshkin et al.*,  
29 2013; *Jolles et al.*, 2017; *Klibaite et al.*, 2017; *Klibaite and Shaevitz*, 2019) is a central goal of the  
30 behavioral sciences—a field that spans disciplines from neuroscience to psychology, ecology, and  
31 genetics. Measuring and modelling behavior is key to understanding these multiple scales of  
32 complexity, and, with this goal in mind, researchers in the behavioral sciences have begun to  
33 integrate theory and methods from physics, computer science, and mathematics (*Anderson and*  
34 *Perona*, 2014; *Berman*, 2018; *Brown and De Bivort*, 2018). A cornerstone of this interdisciplinary  
35 revolution is the use of state-of-the-art computational tools, such as computer vision algorithms,  
36 to automatically measure locomotion and body posture (*Dell et al.*, 2014). Such a rich description  
37 of animal movement then allows for modeling, from first principles, the full behavioral repertoire  
38 of animals (*Berman et al.*, 2014a, 2016; *Wiltschko et al.*, 2015; *Johnson et al.*, 2016; *Todd et al.*,  
39 2017; *Klibaite et al.*, 2017; *Markowitz et al.*, 2018; *Klibaite and Shaevitz*, 2019; *Costa et al.*, 2019).  
40 Tools for automatically measuring animal movement represent a vital first step toward developing  
41 unified theories of behavior across scales (*Berman*, 2018; *Brown and De Bivort*, 2018). Therefore,

42 technical factors like scalability, robustness, and usability are issues of critical importance, especially  
43 as researchers across disciplines begin to increasingly rely on these methods.

44 Two of the most recent contributions to the growing toolbox for quantitative behavioral analysis  
45 are from *Mathis et al. (2018)* and *Pereira et al. (2019)*, who make use of a popular type of machine  
46 learning model known as *convolutional neural networks*, or *CNNs* (*LeCun et al. 2015*; Appendix 1), to  
47 automatically measure detailed representations of animal posture—structural *keypoints*, or *joints*, on  
48 the animal's body—directly from images and without markers. While these methods offer a major  
49 advance over conventional methods with regard to data quality and detail, they have disadvantages  
50 in terms of speed, robustness, and ease of use, which may limit their practical applications. To  
51 address these problems, we introduce a new software toolkit called *DeepPoseKit* that is fast, robust,  
52 and easy-to-use. We run experiments using multiple datasets to compare our methods to those  
53 from *Mathis et al. (2018)* and *Pereira et al. (2019)* and find that our approach offers considerable  
54 performance improvements. These results also demonstrate the flexibility of our methods in both  
55 the laboratory and the field, and our work is widely applicable across a range of scientific disciplines.

## 56 **Animal pose estimation using deep learning**

57 In the past, conventional methods for measuring posture with computer vision relied on species-  
58 specific algorithms (*Uhlmann et al., 2017*), highly-specialized or restrictive experimental setups  
59 (*Mendes et al., 2013*; *Kain et al., 2013*), attaching intrusive physical markers to the study animal  
60 (*Kain et al., 2013*), or some combination thereof. These methods also typically required expert  
61 computer-vision knowledge to use, were limited in the number or type of body parts that could  
62 be tracked (*Mendes et al., 2013*), involved capturing and handling the study animals to attach  
63 markers (*Kain et al., 2013*)—which is not possible for many species—and despite best efforts to  
64 minimize human involvement, often required manual intervention to correct errors (*Uhlmann et al.,*  
65 *2017*). All of these methods were built to work for a small range of conditions and typically required  
66 considerable effort to adapt to novel contexts.

67 In contrast to conventional computer-vision methods, modern deep-learning-based methods  
68 can be used to achieve human-level accuracy in nearly any context by manually annotating data  
69 (Figure 1)—known as a *training set*—and training a general-purpose image-processing algorithm—a  
70 convolutional neural network or CNN—to automatically estimate the locations of an animal's body  
71 parts directly from images (Figure 2). State-of-the-art machine learning methods, like CNNs, use  
72 these training data to parameterize a model of the relationship between a set of input data—i.e.  
73 images—and the desired output distribution—i.e. posture keypoints. After adequate training, a  
74 model can be used to make predictions on previously-unseen data from the same dataset—inputs  
75 that were not part of the training set—which is known as *inference*. In other words, these models  
76 are able to generalize human-level expertise at scale after having been trained on only a relatively  
77 small number of examples. We provide more detailed background information on using CNNs for  
78 pose estimation in Appendices 1–6.

79 Similar to conventional pose estimation methods, the task of implementing deep-learning  
80 models in software and training them on new data is complex and requires expert knowledge.  
81 However, in most cases, once the underlying model and training routine are implemented, a high-  
82 accuracy pose estimation model for a novel context can be built with minimal modification—often  
83 just by changing the training data. With a simplified toolkit and high-level software interface  
84 designed by an expert, even scientists with limited computer-vision knowledge can begin to apply  
85 these methods to their research. Once the barriers for implementing and training a model are  
86 sufficiently reduced, the main bottleneck for using these methods becomes collecting an adequate  
87 training set—a non-expert but labor-intensive task made less time-consuming by techniques  
88 described in Appendix 2.

89 *Mathis et al. (2018)* and *Pereira et al. (2019)* were the first to popularize the use of CNNs  
90 for animal pose estimation. These researchers built on work from the human pose estimation  
91 literature (e.g. *Andriluka et al. 2014*; *Insafutdinov et al. 2016*; *Newell et al. 2016*) using a type of

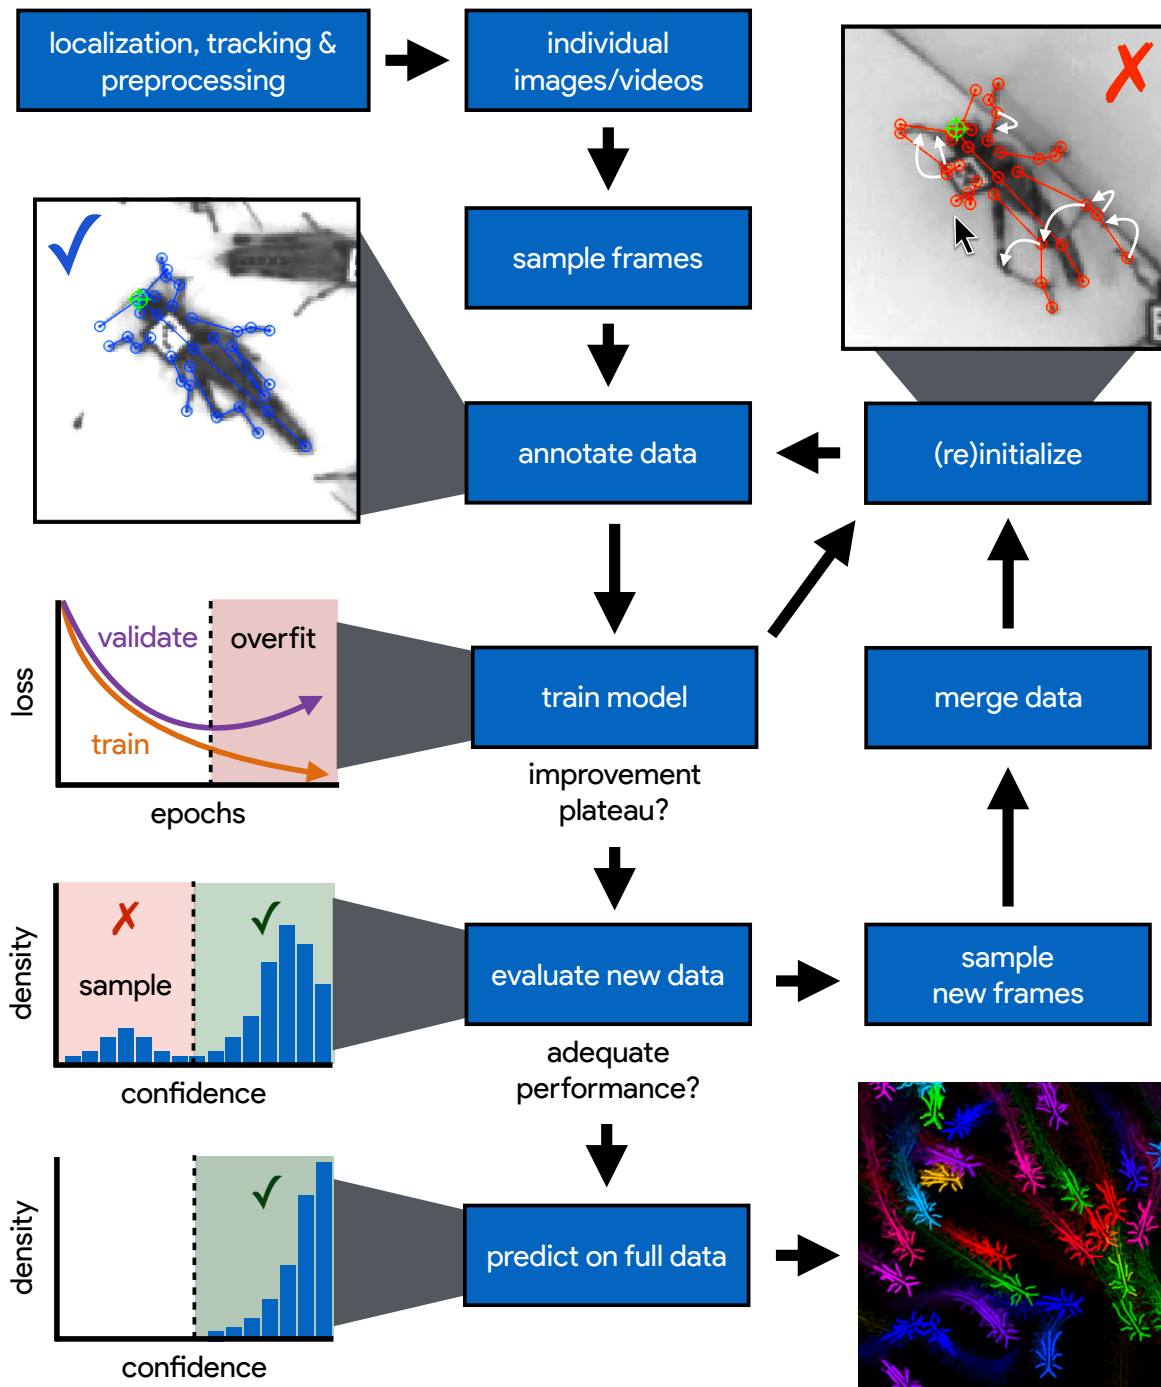

**Figure 1.** An illustration of the workflow for DeepPoseKit. An initial image set is annotated and then iteratively updated using the active learning approach developed by *Pereira et al. (2019)*. The training set is updated with new training examples selected based on the current model performance. This process is repeated as necessary until performance is adequate. The pose estimation model can then be used to make predictions for the full data set, which can then be used for further analysis.

**Figure 1-video 1.** A visualization of the posture data output for a group of locusts (5x speed).

92 *fully-convolutional neural network* or *F-CNN* (Long et al. 2015; Appendix 3) known as an *encoder-*  
93 *decoder* model (Appendix 3 Box 1). These models are used to measure animal posture by training  
94 the network to transform images into probabilistic estimates of keypoint locations, known as  
95 *confidence maps* (shown in Figure 2), that describe the body posture for one or more individuals.  
96 These confidence maps are processed to produce the 2-D spatial coordinates of each keypoint,  
97 which can then be used for further analysis. The methods from Mathis et al. (2018) can be used to  
98 estimate posture for single individuals—known as *individual pose estimation*—or multiple individuals  
99 simultaneously—known as *multiple pose estimation*. In contrast, the methods from Pereira et al.  
100 (2019) are limited to individual pose estimation. The methods we present in this paper are technically  
101 limited to individual pose estimation; however, we successfully remove this limitation and extend  
102 our methods to groups of interacting individuals by first localizing and tracking individuals using  
103 additional software (see Appendix 4 for discussion).

104 Mathis et al. (2018) use a previously-published pose estimation model known as *DeeperCut*  
105 (Insafutdinov et al., 2016), which is built on the popular *ResNet* architecture (He et al., 2016)—a  
106 state-of-the-art model for image classification. This choice is advantageous because the use of a  
107 popular architecture allows for using a pre-trained model to improve performance, known as *transfer*  
108 *learning* (Pratt 1993; Appendix 2), but it is also disadvantageous as the model is *overparameterized*  
109 with >25 million parameters. Overparameterization allows the model to make accurate predictions  
110 at the cost of unnecessarily slow inference. More recent work from Mathis and Warren (2018) has  
111 shown that the inference speed for *DeeperCut* (Insafutdinov et al., 2016) can be improved at the  
112 expense of increased prediction error. The original methods from Mathis et al. (2018) may also be  
113 difficult to use for beginners, but recent updates to the software have attempted to address this  
114 problem (see Nath et al. 2018).

115 With regard to model design, Pereira et al. (2019) take the opposite approach of implementing  
116 a custom network architecture that attempts to limit model complexity and overparameterization  
117 (Appendix 6), which they call *LEAP* (LEAP Estimates Animal Pose). *LEAP* is advantageous because it is  
118 explicitly designed for fast inference but has disadvantages such as a lack of robustness to data  
119 variance, like rotations or shifts in lighting, and an inability to generalize to new experimental setups.  
120 Additionally, to achieve maximum performance, the *LEAP* framework requires computationally  
121 expensive preprocessing that is not practical for many datasets, which makes it unsuitable for a  
122 wide range of experiments (see Appendix 6 for more details). The software from Pereira et al.  
123 (2019) is generally easy to install and use, but much of the interface is written in *MATLAB* (The  
124 Mathworks Inc.), which requires an expensive and restrictive software license.

125 Together the methods from Mathis et al. (2018) and Pereira et al. (2019) represent the two  
126 extremes of a phenomenon known as the *speed-accuracy trade-off* (Huang et al., 2017b)—an active  
127 area of research in the machine learning literature. Mathis et al. (2018) prioritize accuracy over  
128 speed by using a large overparameterized model (Insafutdinov et al., 2016), and Pereira et al. (2019)  
129 prioritize speed over accuracy by using a smaller less-robust model. While this speed-accuracy  
130 trade-off can limit the capabilities of CNNs, there has been extensive work to make these models  
131 more efficient without impacting performance (e.g. Chollet 2017; Huang et al. 2017a; Sandler et al.  
132 2018). To address the limitations of this trade-off, we apply recent developments from the machine  
133 learning literature and provide an effective solution to the problem. In the case of *F-CNN* models  
134 used for pose estimation, improvements in efficiency and robustness have been made through  
135 the use of *multi-scale inference* (Appendix 3 Box 1) and by increasing the number of connections  
136 between layers in the model (Appendix 3 Figure 1)—both of which we incorporate into our methods.

## 137 **Methods and Results**

138 Here we introduce fast, flexible, and robust pose estimation methods with a software interface  
139 that emphasizes usability. Our methods build on the state-of-the-art for individual pose estimation  
140 (Newell et al. 2016; Appendix 5), convolutional regression models (Jégou et al. 2017; Appendix  
141 3 Box 1), and conventional computer vision algorithms (Guizar-Sicairos et al., 2008) to improve

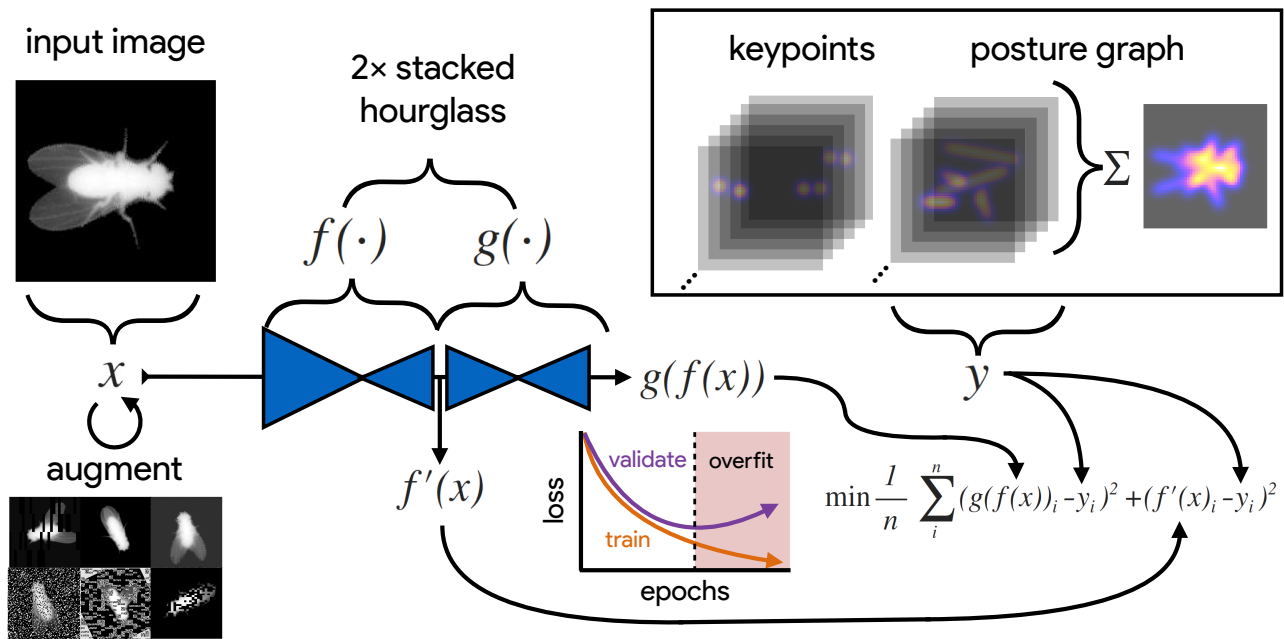

**Figure 2.** An illustration of the model training process for DeepPoseKit. Input images  $x$  (top-left) are augmented (bottom-left) with various spatial transformations (rotation, translation, scale, etc.) followed by noise transformations (dropout, additive noise, blurring, contrast, etc.) to improve the robustness and generalization of the model. The ground truth annotations are then transformed with matching spatial augmentations (not shown for the sake of clarity) and used to draw the confidence maps  $y$  for the keypoints and hierarchical posture graph (top-right). The images  $x$  are then passed through the network to produce a multidimensional array  $g(f(x))$ —a stack of images corresponding to the keypoint and posture graph confidence maps for the ground truth  $y$ . Mean squared error between the outputs for both hourglasses  $g(f(x))$  and  $f'(x)$  and the ground truth data  $y$  is then minimized (bottom-right), where  $f'(x)$  indicates a subset of the output from  $f(x)$ —only those feature maps being optimized to reproduce the confidence maps for the purpose of intermediate supervision (Appendix 5). The loss function is minimized until the validation loss stops improving—indicating that the model has converged or is starting to overfit to the training data.

142 model efficiency and achieve faster, more accurate results on multiple challenging pose estimation  
 143 tasks. We developed two model implementations—including a new model architecture that we call  
 144 *Stacked DenseNet*—and a new method for processing confidence maps called *subpixel maxima* that  
 145 provides fast and accurate results with subpixel precision—even at low resolutions. We also discuss  
 146 a modification to incorporate the global geometry between keypoints when training pose estimation  
 147 models that increases accuracy without decreasing speed. We ran experiments to optimize our  
 148 approach and compared our models to those from *Insafutdinov et al. (2016)* (DeeperCut)—the  
 149 model used by *Mathis et al. (2018)*—and *Pereira et al. (2019)* (LEAP) using three image datasets  
 150 filmed in the laboratory and the field—including multiple interacting individuals that were first  
 151 localized and cropped from larger, multi-individual images.

## 152 **An end-to-end pose estimation framework**

153 We provide a full-featured, extensible, and easy-to-use software package that is written entirely  
 154 in the Python programming language (Python Software Foundation) and is built on the popular  
 155 Keras deep-learning package (*Chollet et al., 2015*)—using Tensorflow as a backend (*Abadi et al.,*  
 156 *2015*). Our software is a complete, end-to-end pipeline (Figure 1) with a custom GUI (graphical  
 157 user interface) for creating annotated training data with *active learning* similar to *Pereira et al.*  
 158 *(2019; Appendix 2)*, as well as an interface for *data augmentation* (*Jung 2018; Appendix 2*; shown  
 159 in Figure 2), model training and evaluation (Figure 2; Appendix 1), and running inference on new  
 160 data. We designed our high-level programming interface to be a testbed for experimentation,  
 161 allowing the user to go from idea to execution as quickly as possible, and we organized our software  
 162 into a Python module called *DeepPoseKit*. The code, documentation, and examples for our entire

163 software package are freely available at <https://github.com/jgraving/deepposekit> under a permissive  
164 open-source license.

### 165 **Our pose estimation models**

166 To achieve the goal of “fast animal pose estimation” introduced by *Pereira et al. (2019)*, while  
167 also wanting to achieve the robust predictive power of models like DeeperCut (*Insafutdinov et al.,*  
168 *2016*), we implemented two fast pose estimation models that extend the current state-of-the-art  
169 for individual pose estimation introduced by *Newell et al. (2016)* and the current state-of-the  
170 art for convolutional regression from *Jégou et al. (2017)*. Our model implementations use fewer  
171 parameters than both DeeperCut (*Insafutdinov et al., 2016*) and LEAP (*Pereira et al., 2019*) while  
172 simultaneously removing many of the limitations of these architectures.

173 In order to limit overparameterization while minimizing performance loss, we designed our  
174 models to allow for multi-scale inference (Appendix 3 Box 1) while optimizing our model hyper-  
175 parameters for efficiency. Our first model is a novel implementation of *FC-DenseNet* from *Jégou*  
176 *et al. (2017; Appendix 3 Box 1)* arranged in a stacked configuration similar to *Newell et al. (2016;*  
177 *Appendix 5)*. We call this new model Stacked DenseNet, and to the best of our knowledge, this is  
178 the first implementation of this architecture in the literature—for pose estimation or otherwise.  
179 Further details for this model are available in Appendix 8. Our second model is a modified version  
180 of the *Stacked Hourglass* model from *Newell et al. (2016; Appendix 5)* with hyperparameters that  
181 allow for changing the number of filters in each convolutional block to constrain the number of  
182 parameters—rather than using 256 filters for all layers as described in *Newell et al. (2016)*.

### 183 **Subpixel keypoint prediction on the GPU**

184 In addition to implementing our efficient pose estimation models, we developed a new method  
185 to process the model outputs to allow for faster, more accurate predictions. When using a fully-  
186 convolutional posture estimation model, the confidence maps produced by the model must be  
187 converted into coordinate values for the predictions to be useful, and there are typically two choices  
188 for making this conversion. The first is to move the confidence maps out of GPU memory and  
189 post-process them on the CPU. This solution allows for easy, flexible, and accurate calculation of  
190 the coordinates with subpixel precision. However, CPU processing is not ideal because moving  
191 large arrays of data between the GPU and CPU is costly, and computation on the CPU is generally  
192 slower. The other option is to directly process the confidence maps on the GPU and then move the  
193 coordinate values from the GPU to the CPU. This approach usually means converting confidence  
194 maps to integer coordinates based on the row and column index of the global maximum for each  
195 confidence map. However, this means that, to achieve a precise estimation, the confidence maps  
196 should be predicted at the full resolution of the input image, or larger, which slows down inference  
197 speed.

198 As an alternative to these two strategies, we introduce a new GPU-based convolutional layer that  
199 we call *subpixel maxima*. This layer uses the fast, efficient, image registration algorithm introduced  
200 by *Guizar-Sicairos et al. (2008)* to translationally align a centered two-dimensional Gaussian filter  
201 to each confidence map via Fourier-based convolution. The translational shift between the filter  
202 and each confidence map allows us to calculate the coordinates of the global maxima with high  
203 speed and subpixel precision. This technique allows for accurate predictions even if the model's  
204 confidence maps are dramatically smaller than the resolution of the input image.

### 205 **Learning global relationships between keypoints**

206 Minimizing extreme prediction errors is important to prevent downstream effects on any further  
207 behavioral analysis—especially in the case of analyses based on time-frequency transforms like  
208 those from *Berman et al. (2014a, 2016)*; *Klibaite et al. (2017)*; *Todd et al. (2017)*; *Klibaite and Shae-*  
209 *vitz (2019)* and *Pereira et al. (2019)* where high magnitude errors can cause inaccurate behavioral  
210 classifications. One way to minimize extreme errors when estimating posture is to incorporate

211 multiple spatial scales when making predictions. Our pose estimation models are *implicitly* capable  
212 of using information from multiple spatial scales (see Appendix 3 Box 1), but there is no *explicit*  
213 signal that optimizes the model to take advantage of this information when making predictions.

214 To remedy this, we modified the model's output to predict, in addition to the keypoint locations,  
215 a hierarchical graph of edges describing the global geometry between keypoints—similar to the part  
216 affinity fields described by *Cao et al. (2017)*. This was achieved by adding an extra set of confidence  
217 maps to the output where edges in the postural graph are represented by Gaussian-blurred lines  
218 the same width as the Gaussian peaks in the keypoint confidence maps. Our posture graph output  
219 then consists of four levels: (1) a set of confidence maps for the smallest limb segments in the graph  
220 (e.g. foot to ankle, knee to hip, etc.; Figure 2), (2) a set of confidence maps for individual limbs (e.g.  
221 left leg, right arm, etc.; Figure 3), (3) a map with the entire postural graph, and (4) a fully-integrated  
222 map that incorporates the entire posture graph and confidence peaks for all of the joint locations  
223 (Figure 2). Each level of the hierarchical graph is built from lower levels in the output, which forces  
224 the model to learn correlated features across multiple scales when making predictions.

## 225 Experiments and model comparisons

226 We ran three experiments to test and optimize our approach. First, we compared our new subpixel  
227 maxima layer to an integer-based global maxima with downsampled outputs ranging from 1× to  
228  $\frac{1}{16}$ × the input resolution using our Stacked DenseNet model. Next, we tested if training a Stacked  
229 DenseNet model to predict the global geometry of the posture graph improves accuracy. Finally,  
230 we compared our model implementations of Stacked Hourglass and Stacked DenseNet to the  
231 models from *Pereira et al. (2019)* and *Insafutdinov et al. (2016)*, which we also implemented in  
232 our framework (see Appendix 8 for details on our implementation of *Insafutdinov et al. 2016*).  
233 When benchmarking these models we incorporated the relevant improvements from our exper-  
234 iments—including subpixel maxima and predicting global geometry between keypoints—unless  
235 otherwise noted.

## 236 Datasets

237 We performed experiments using the vinegar or "fruit" fly (*Drosophila melanogaster*) dataset (Figure  
238 3-video 1) provided by *Pereira et al. (2019)*, and to demonstrate the versatility of our methods we  
239 also compared model performance across two previously unpublished posture data sets from  
240 groups of desert locusts (*Schistocerca gregaria*) filmed in a laboratory setting (Figure 3-video 2),  
241 and herds of Grévy's zebras (*Equus grevyi*) filmed in the wild (Figure 3-video 3). Our locust dataset  
242 was filmed from above using a high-resolution camera (Basler ace acA2040-90umNIR) and video  
243 recording system (Motif, loopbio GmbH), and our zebra dataset was filmed from above using  
244 a commercially-available quadcopter drone (DJI Phantom 4 Pro). Individuals in the videos were  
245 positionally tracked and the videos were then cropped using the egocentric coordinates of each  
246 individual and saved as separate videos—one for each individual. Further details of how these  
247 image datasets were acquired, preprocessed, and tracked before applying our pose estimation  
248 methods will be described elsewhere. The locust and zebra datasets are particularly challenging  
249 as they feature multiple interacting individuals—with focal individuals centered in the frame—and  
250 the latter with highly-variable light conditions. Before training each model we split each data set  
251 into randomly selected training and validation sets with 90% training examples and 10% validation  
252 examples. The details for each dataset are described in Table 1.

## 253 Model training

254 For each experiment, we set our model hyperparameters to the same configuration and all models  
255 were trained with  $\frac{1}{4}$ × resolution outputs and a stack of two hourglasses with two outputs where  
256 loss was applied (see Figure 2). Although our model hyperparameters could be infinitely adjusted to  
257 trade off between speed and accuracy, we compared only one configuration for each of our model  
258 implementations. These results are not meant to be an exhaustive search of model configurations

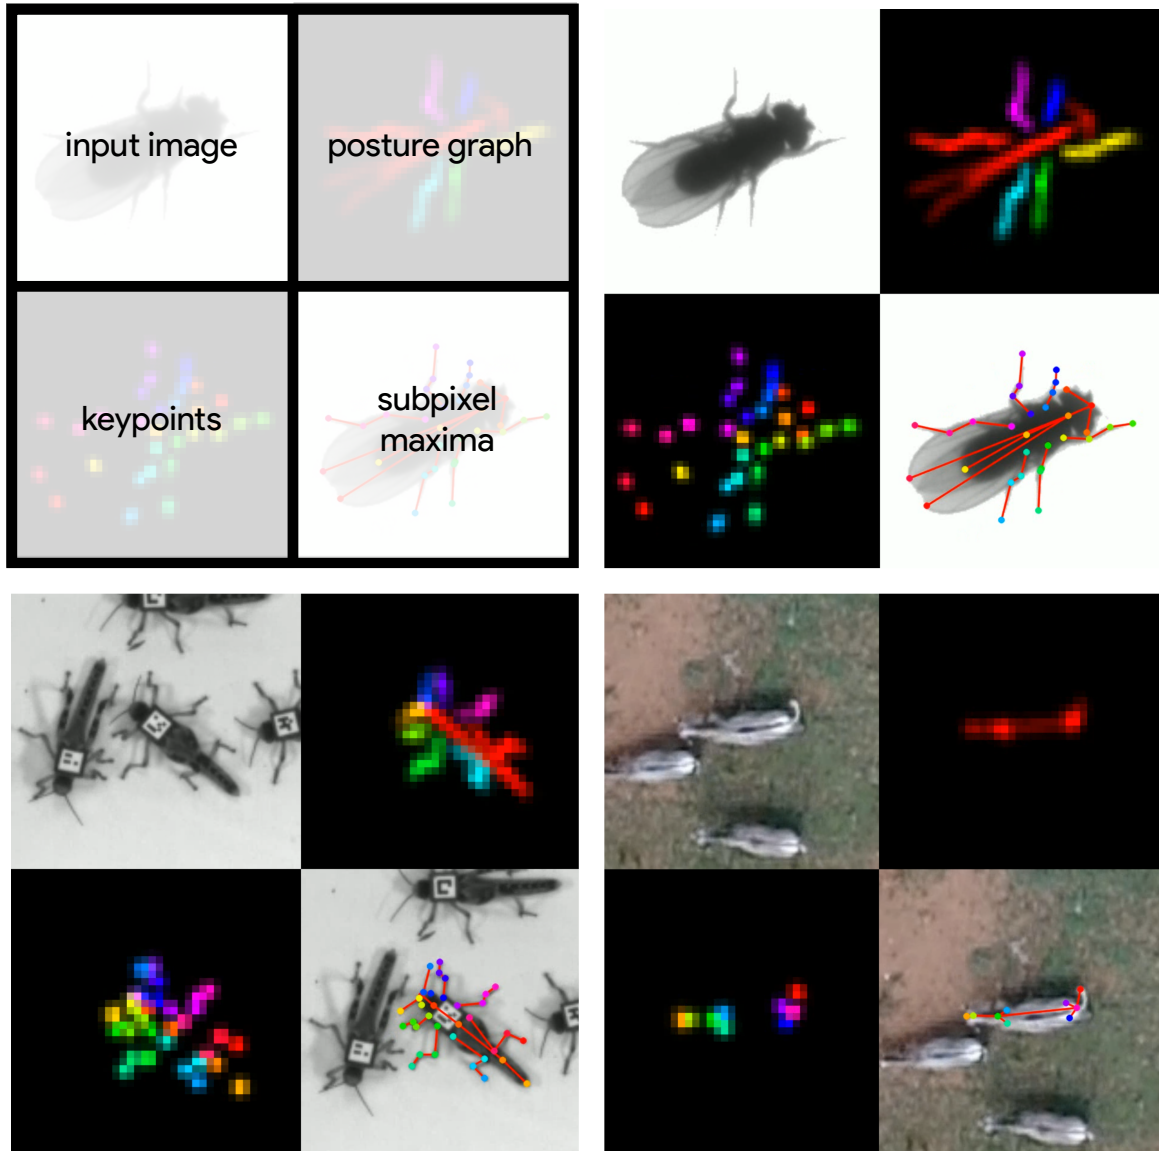

**Figure 3.** A visualization of the datasets we used to evaluate our methods (Table 1). For each dataset, confidence maps for the keypoints (bottom-left) and posture graph (top-right) are illustrated using different colors for each map. These outputs are from our Stacked DenseNet model at  $\frac{1}{4}\times$  resolution.

**Figure 3-video 1.** A video of a behaving fly from *Pereira et al. (2019)* with pose estimation outputs visualized.

**Figure 3-video 2.** A video of a behaving locust with pose estimation outputs visualized.

**Figure 3-video 3.** A video of a behaving Grévy's zebra with pose estimation outputs visualized.

**Table 1.** Datasets used for model comparisons.

| Name          | Species                        | Resolution | # Images | # Keypoints | Individuals | Source                       |
|---------------|--------------------------------|------------|----------|-------------|-------------|------------------------------|
| Vinegar fly   | <i>Drosophila melanogaster</i> | 192×192    | 1500     | 32          | Single      | <i>Pereira et al. (2019)</i> |
| Desert locust | <i>Schistocerca gregaria</i>   | 160×160    | 800      | 35          | Multiple    | This paper                   |
| Grévy's zebra | <i>Equus grevyi</i>            | 160×160    | 1000     | 9           | Multiple    | This paper                   |



259 as the best configuration will depend on the application. The details of the hyperparameters we  
260 used for each model are described in Appendix 8.

261 To make our posture estimation tasks closer to realistic conditions and properly demonstrate  
262 the robustness of our methods to rotation, translation, and scale, we applied various augmentations  
263 to each data set during training. All models were trained using data augmentations that included  
264 random flipping, or mirroring, along both image axes with 0.5 probability, random rotations around  
265 the center of the image in the range  $[-180^\circ, +180^\circ]$ , random scaling between  $[90\%, 110\%]$  for flies  
266 and locusts, random scaling between  $[75\%, 125\%]$  for zebras to account for greater size variation  
267 in the data set, and random translations in the range  $[-5\%, +5\%]$ . After performing these spatial  
268 augmentations we also applied a variety of noise augmentations that included multiple types of  
269 additive noise, dropout, blurring, and contrast augmentations to further ensure robustness and  
270 generalization.

271 We trained our models (Figure 2) using mean squared error loss optimized using the ADAM  
272 optimizer (Kingma and Ba, 2014) with a learning rate of  $1 \times 10^{-3}$  and a batch size of 16. We lowered  
273 the learning rate by a factor of 5 each time the validation loss did not improve by more than  $1 \times 10^{-3}$   
274 for 10 epochs. We considered models to be converged when the validation loss stopped improving  
275 for 50 epochs, and we calculated validation error as the Euclidean distance between predicted  
276 and ground-truth image coordinates for only the best performing version of the model, which we  
277 evaluated at the end of each epoch during optimization. We performed this procedure five times  
278 for each experiment and randomly selected a new validation set for each replicate.

## 279 **Model evaluation**

280 Machine learning models are typically evaluated for their ability to generalize to new data, known  
281 as *predictive performance*, using a held-out *test set*—a subsample of annotated data that is not used  
282 for training or validation. However, when fitting and evaluating a model on a small dataset, using  
283 an adequately-sized validation and test set can lead to erroneous conclusions about the predictive  
284 performance of the model if the training set is too small (Kuhn and Johnson, 2013). Therefore, to  
285 maximize the size of the training set, we elected to use only a validation set for model evaluation.

286 Generally a test set is used to avoid biased performance measures caused by overfitting the  
287 model hyperparameters to the validation set. However, we did not adjust our model architecture to  
288 achieve better performance on our validation set—only to achieve fast inference speeds. While we  
289 did use validation error to decide when to lower the learning rate during training and when to stop  
290 training, lowering the learning rate in this way should have no effect on the generalization ability  
291 of the model, and because we heavily augment our training set during optimization—forcing the  
292 model to learn a much larger image distribution than what is included in the training and validation  
293 sets—overfitting to the validation set is unlikely. We also demonstrate the generality of our results  
294 for each experiment by randomly selecting a new validation set with each replicate. All of these  
295 factors make the Euclidean error for the unaugmented validation set a reasonable measure of the  
296 predictive performance for each model.

297 The inference speed for each model was assessed by running predictions on 100,000 randomly  
298 generated images with a batch size of 1 for real-time speeds and a batch size of 100 for offline  
299 speeds. Our hardware consisted of a Dell Precision Tower 7910 workstation (Dell, Inc.) running  
300 Ubuntu Linux v18.04 with 2x Intel Xeon E5-2623 v3 CPUs (8 cores, 16 threads at 3.00GHz), 64GB  
301 of RAM, and a Titan Xp GPU (NVIDIA Corporation). While the hardware we used for development  
302 and testing is quite advanced, there is no requirement for this level of performance, and our  
303 software can easily be run on lower-end hardware. We evaluated inference speeds on multiple  
304 consumer-grade desktop computers and found similar performance ( $\pm 10\%$ ) when using the same  
305 GPU.

### 306 **Assessing prediction accuracy with Bayesian inference**

307 To more rigorously assess performance differences between models, we parameterized the Euclidean error distribution for each experiment by fitting a Bayesian linear model with a Gamma-distributed likelihood function. This model takes the form:

$$\begin{aligned} p(y|X, \theta_\mu, \theta_\phi) &\sim \text{Gamma}(\alpha, \beta) \\ \alpha &= \mu^2 \phi^{-1} \\ \beta &= \mu \phi^{-1} \\ \mu &= h(X\theta_\mu) \\ \phi &= h(X\theta_\phi) \end{aligned}$$

310 where  $X$  is the design matrix composed of binary indicator variables for each pose estimation  
311 model,  $\theta_\mu$  and  $\theta_\phi$  are vectors of intercepts,  $h(\cdot)$  is the softplus function (*Dugas et al., 2001*)—or  $h(x) =$   
312  $\log(1 + e^x)$ —used to enforce positivity of  $\mu$  and  $\phi$ , and  $y$  is the Euclidean error of the pose estimation  
313 model. Parameterizing our error distributions in this way allows us to calculate the posterior  
314 distributions for the mean  $E[y] = \alpha\beta^{-1} \equiv \mu$  and variance  $\text{Var}[y] = \alpha\beta^{-2} \equiv \phi$ . This parameterization  
315 then provides us with a statistically rigorous way to assess differences in model performance in  
316 terms of both central tendency and spread—accounting for both epistemic uncertainty (unknown  
317 unknowns, e.g. parameter uncertainty) and aleatoric uncertainty (known unknowns, e.g. data  
318 variance). Details of how we fitted these models can be found in Appendix 7.

### 319 **Subpixel prediction allows for fast and accurate inference**

320 We compared the accuracy of our subpixel maxima layer to an integer-based maxima layer using the  
321 fly dataset. We found significant accuracy improvements across every downsampling configuration  
322 (Appendix Figure 5). Even with confidence maps at  $\frac{1}{8}\times$  the resolution of the original image, error  
323 did not drastically increase compared to full-resolution predictions. Making predictions at such  
324 a downsampled resolution allows us to achieve very fast inference  $>1000$  Hz while maintaining  
325 relatively high accuracy. Additionally, achieving fast pose estimation using CNNs typically relies on  
326 massively parallel processing on the GPU with large batches of data, which makes fast real-time  
327 inference challenging to accomplish. Our Stacked DenseNet model, with a batch size of one, can run  
328 inference at  $\sim 30$ - $110$ Hz—depending on resolution (Appendix Figure 5a)—which could be further  
329 improved by reconfiguring the model with fewer parameters. This opens the door to *truly* real-time  
330 behavioral experiments with prediction errors similar to current state-of-the-art methods.

### 331 **Predicting global geometry improves accuracy and reduces extreme errors**

332 We find that forcing the pose estimation model to predict a hierarchical posture graph reduces  
333 prediction error (Appendix Figure 6), and because the feature maps for the posture graph can be  
334 removed from the final output during inference, this effectively improves prediction accuracy for  
335 free. Both the mean and variance of the error distributions were lower when predicting the posture  
336 graph, which suggests that learning global geometry both decreases error *on average* and helps to  
337 reduce *extreme* prediction errors. The overall effect size for this decrease in error is fairly small ( $<1$   
338 pixel average reduction in error), but based on the results from the zebra dataset, this modification  
339 more dramatically improves performance for datasets with higher-variance images and sparse  
340 posture graphs. These results also suggest that annotating multiple keypoints to incorporate an  
341 explicit signal for global information may help improve prediction accuracy for a specific body part  
342 of interest.

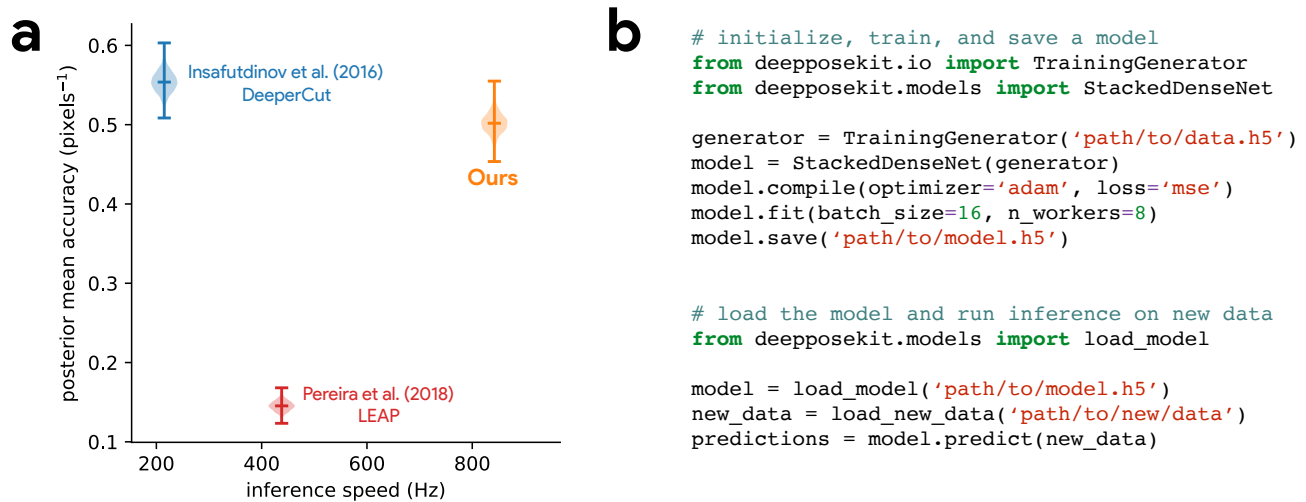

**Figure 4.** Our methods estimate posture at 2×—or greater—the speed of *Pereira et al. (2019)* while achieving similar accuracy to *Insafutdinov et al. (2016)*—the model used by *Mathis et al. (2018)*—shown here as mean accuracy (inverse Euclidean error) for our most challenging dataset of multiple interacting Grévy's zebras (*E. grevyi*) filmed in the wild (a). Our software interface is designed to be straightforward but flexible. We include many options for expert users to customize model training with sensible default settings to make pose estimation as easy as possible for beginners. For example, training a model and running inference on new data requires writing only a few lines of code and specifying some basic settings (b).

### Our models are fast and robust

343 Finally, we benchmarked our model implementations against the models from *Pereira et al. (2019)*  
344 and *Insafutdinov et al. (2016)*. We find that our Stacked DenseNet model outperforms both  
345 LEAP (*Pereira et al., 2019*) and DeeperCut (*Insafutdinov et al., 2016*) in terms of speed while also  
346 achieving much higher accuracy than LEAP (*Pereira et al., 2019*) with similar accuracy to DeeperCut  
347 (*Insafutdinov et al., 2016*) (Figure 4a). We found that both the Stacked Hourglass and Stacked  
348 DenseNet models outperformed LEAP (*Pereira et al., 2019*) with >2× faster inference speeds  
349 and >3× higher mean accuracy. Not only were our models' average prediction error significantly  
350 improved, but also, importantly, the variance was lower—indicating that our models produced fewer  
351 extreme prediction errors. At  $\frac{1}{4}$ × resolution, our Stacked DenseNet implementation consistently  
352 achieved prediction accuracy comparable to that of *Insafutdinov et al. (2016)*—with <0.5-pixel  
353 increase in average error—while running inference at nearly 4× the speed and using only ~2% of  
354 the parameters— ~26 million vs. ~0.5 million. The inference speed could be further improved  
355 by using a  $\frac{1}{8}$ × output without much increase in error (Appendix Figure 5) or by further adjusting  
356 the hyperparameters to constrain the size of the model. Our Stacked Hourglass implementation  
357 followed closely behind this level of performance but consistently performed worse than our  
358 Stacked DenseNet model. We were also able to reproduce the results reported by *Pereira et al.*  
359 (*2019*) that LEAP and the Stacked Hourglass model from *Newell et al. (2016)* have similar average  
360 prediction error for the fly dataset. However, we also find that LEAP (*Pereira et al., 2019*) has much  
361 higher variance, which suggests it is more prone to extreme prediction errors—a problem for  
362 further data analysis. Detailed results of our model comparisons are shown in Appendix Figure 7.  
363

### Discussion

364 Here we have presented a new framework for estimating animal posture using deep learning models.  
365 We built on the state-of-the-art for individual pose estimation using convolutional neural networks  
366 to achieve fast inference without significantly reducing accuracy. Our pose estimation methods  
367 outperform currently-available methods from *Mathis et al. (2018)* (DeeperCut; *Insafutdinov et al.*  
368 *2016*) and *Pereira et al. (2019)* (LEAP) while also providing a simplified interface (Figure 4b) for  
369 using these advanced tools to measure animal behavior and locomotion. We tested our methods  
370

371 across a range of datasets from controlled laboratory environments with single individuals to  
372 challenging field situations with multiple interacting individuals and variable lighting conditions. We  
373 found that our methods perform well for all of these situations. We ran experiments to optimize  
374 our approach and discovered that some straightforward modifications can greatly improve speed  
375 and performance. Additionally, we demonstrated that these modifications improve not the just  
376 the average error but also help to reduce extreme prediction errors—a key determinant for the  
377 reliability of subsequent statistical analysis.

378 We highlighted important considerations when using CNNs for pose estimation and reviewed  
379 the progress of fully-convolutional regression models from the literature. Recent advancements  
380 for these models have been driven mostly by a strategy of adding more connections between  
381 layers to increase performance and efficiency (e.g. *Jégou et al. 2017*). New fundamentally-different  
382 models (*Sabour et al., 2017*) and loss functions (*Chen et al., 2017*) may provide further performance  
383 improvements. Recent work (e.g. *Weigert et al. 2018; Roy et al. 2018*) has also shown that future  
384 progress may require more mathematically-principled approaches such as applying probabilistic  
385 concepts (*Kendall and Gal, 2017*) and Bayesian inference at scale (*Tran et al., 2018*).

386 Measuring behavior is an critical factor for many studies in neuroscience (*Krakauer et al.,*  
387 *2017*). Understanding the connections between brain activity and behavioral output requires  
388 detailed and objective descriptions of body posture that match the richness and resolution neural  
389 measurement technologies have provided for years (*Anderson and Perona, 2014; Berman, 2018;*  
390 *Brown and De Bivort, 2018*), which our methods and other deep-learning-based tools provide  
391 (*Mathis et al., 2018; Pereira et al., 2019*). We have also demonstrated the possibility that our  
392 toolkit could be used for truly real-time inference, which allows for closed-loop experiments where  
393 sensory stimuli or optogenetic stimulation are controlled in response to behavioral measurements  
394 (e.g. *Bath et al. 2014; Stowers et al. 2017*). Using real-time measurements in conjunction with  
395 optogenetics or thermogenetics may be key to disentangling the causal structure of motor output  
396 from the brain—especially given that recent work has shown an animal's response to optogenetic  
397 stimulation can differ depending on the behavior it is currently performing (*Cande et al., 2018*).  
398 Real-time behavioral quantification is also particularly important as closed-loop virtual reality is  
399 quickly becoming an indispensable tool for studying sensorimotor relationships in individuals and  
400 collectives (*Stowers et al., 2017*).

401 Quantifying individual movement is essential for revealing the genetic (*Kain et al., 2012; Ayroles*  
402 *et al., 2015*) and environmental (*Bierbach et al., 2017; Akhund-Zade et al., 2019*) underpinnings  
403 of phenotypic variation in behavior—as well as the phylogeny of behavior (e.g. *Berman et al.*  
404 *2014b*). Measuring individual behavioral phenotypes requires tools that are robust, scaleable, and  
405 easy-to-use, and our approach offers the ability to quickly and accurately quantify the behavior of  
406 many individuals in great detail. When combined with tools for genetic manipulations (*Ran et al.,*  
407 *2013; Doudna and Charpentier, 2014*), high-throughput behavioral experiments (*Alisch et al., 2018;*  
408 *Werkhoven et al., 2019*), and behavioral analysis (e.g. *Berman et al. 2014a; Pereira et al. 2019;*  
409 *Wiltchko et al. 2015*), our methods could help to provide the data resolution and statistical power  
410 needed for dissecting the complex relationships between genes, environment, and behavioral  
411 variation.

412 When used together with other tools for localization and tracking, our methods are capable of re-  
413 liably measuring posture for multiple interacting individuals. The importance of measuring detailed  
414 representations of individual behavior when studying animal collectives has been well established  
415 (*Strandburg-Peshkin et al., 2013; Rosenthal et al., 2015; Strandburg-Peshkin et al., 2015, 2017*).  
416 Estimating body posture is an essential first step for unraveling the sensory networks that drive  
417 group coordination, such as vision-based networks measured via raycasting (*Strandburg-Peshkin*  
418 *et al., 2013; Rosenthal et al., 2015*). Additionally, using body pose estimation in combination with  
419 computational models of behavior (e.g. *Costa et al. 2019, Wiltchko et al. 2015*) and unsupervised  
420 behavioral classification methods (e.g. *Berman et al. 2014a, Pereira et al. 2019*) may allow for fur-  
421 ther dissection of how information flows through collectives by revealing the networks of behavioral

422 contagion across multiple timescales and sensory modalities.

423 When combined with unmanned aerial vehicles (UAVs; *Schiffman 2014*) or other field-based  
424 imaging (*Francisco et al., 2019*), applying these methods to the study of individuals and groups in  
425 the wild can provide high-resolution behavioral data that goes beyond the capabilities of current  
426 GPS and accelerometry-based technologies (*Nagy et al., 2010, 2013; Kays et al., 2015; Strandburg-*  
427 *Peshkin et al., 2015, 2017; Flack et al., 2018*)—especially for species that cannot be studied with  
428 tags or collars. Additionally, by applying these methods in conjunction with 3-D habitat recon-  
429 struction—using techniques such as photogrammetry—field-based studies can begin to integrate  
430 fine-scale behavioral measurements with the full 3-D environment in which the behavior evolved  
431 (e.g. *Strandburg-Peshkin et al. 2017; Francisco et al. 2019*). This combination of technologies could  
432 allow researchers to address questions about the behavioral ecology of animals that were previously  
433 impossible to answer.

434 In conclusion, we have presented a toolkit, called DeepPoseKit, for automatically measuring  
435 animal posture from images. Our methods are fast, robust, and widely applicable to a range of  
436 species and experimental conditions. When designing our framework we emphasized usability  
437 across our entire software interface, which we expect will help to make these advanced tools acces-  
438 sible to a wider range of researchers. The fast inference and real-time capabilities of our methods  
439 should also help further reduce barriers to previously intractable questions across many scientific  
440 disciplines—including neuroscience, ethology, and behavioral ecology—both in the laboratory and  
441 the field.

#### 442 **Author contributions**

443 J.M.G and I.D.C conceived the idea for the project. J.M.G. and D.C. developed the software with input  
444 from H.N. J.M.G implemented the pose estimation models and developed the subpixel maxima  
445 algorithm. J.M.G. and D.C. developed the annotation GUI, data augmentation pipeline, and wrote the  
446 documentation. J.M.G., D.C. and H.N. designed the experiments. J.M.G. and D.C. ran the experiments.  
447 B.R.C., B.K., J.M.G., and I.D.C. conceived the idea to apply posture tracking to zebras. B.R.C. and  
448 B.K. provided the annotated zebra posture data. B.K., and L.L. helped with initial testing and  
449 improvement of the software interface. L.L. also made significant contributions to an earlier version  
450 of the manuscript. J.M.G. fit the linear models and made the figures. J.M.G. wrote the initial draft of  
451 the manuscript with input from H.N. and D.C., and all authors helped revise the manuscript.

#### 452 **Acknowledgements**

453 We are indebted to Talmo Pereira et al. and Mathis et al. for making their software open-source and  
454 freely-available—this project would not have been possible without them. We also thank François  
455 Chollet, the Keras team, and Alexander Jung for their open source contributions, which provided the  
456 core programming interface for our work. We thank Vivek H. Sridhar, Michael L. Smith, and Joseph  
457 B. Bak-Coleman for their helpful discussions on the project. We also thank M.L.S. for the use of his  
458 GPU. We thank Felicitas Oehler for annotating the zebra posture data and Chiara Hirschhorn for  
459 assistance with filming the locusts and annotating the locust posture data. We thank Alex Bruttel,  
460 Christine Bauer, Jayme Weglarski, Dominique Leo, and loobio GmbH for providing technical support.  
461 We acknowledge the NVIDIA Corporation for their generous donations to our research. This project  
462 received funding from the European Union's Horizon 2020 research and innovation programme  
463 under the Marie Skłodowska-Curie grant agreement No. 748549. B.R.C. acknowledges support  
464 from the University of Konstanz Zukunftskolleg's Investment Grant program. I.D.C. acknowledges  
465 support from NSF Grant IOS-1355061, Office of Naval Research Grants N00014-09-1-1074 and  
466 N00014-14-1-0635, Army Research Office Grants W911NG-11-1-0385 and W911NF14-1-0431, the  
467 Struktur-und Innovationsfonds für die Forschung of the State of Baden-Württemberg, the DFG  
468 Centre of Excellence 2117 "Centre for the Advanced Study of Collective Behaviour" (ID: 422037984),  
469 and the Max Planck Society.

## 470 **Animal Ethics Statement**

471 All procedures for collecting the zebra (*E. grevyi*) dataset were reviewed and approved by Ethikrat,  
472 the independent Ethics Council of the Max Planck Society. The zebra dataset was collected with  
473 the permission of Kenya's National Commission for Science, Technology and Innovation (NA-  
474 COSTI/P/17/59088/15489 and NACOSTI/P/18/59088/21567) using drones operated by B.R.C. with  
475 the permission of the Kenya Civil Aviation Authority (authorization numbers: KCAA/OPS/2117/4  
476 Vol. 2 (80), KCAA/OPS/2117/4 Vol. 2 (81), KCAA/OPS/2117/5 (86) and KCAA/OPS/2117/5 (87); RPAS  
477 Operator Certificate numbers: RPA/TP/0005 AND RPA/TP/000-0009).

## 478 **References**

- 479 **Abadi M**, Agarwal A, Barham P, Brevdo E, Chen Z, Citro C, Corrado GS, Davis A, Dean J, Devin M, Ghemawat S,  
480 Goodfellow I, Harp A, Irving G, Isard M, Jia Y, Jozefowicz R, Kaiser L, Kudlur M, Levenberg J, et al., TensorFlow:  
481 Large-Scale Machine Learning on Heterogeneous Systems; 2015. <https://www.tensorflow.org/>, software  
482 available from tensorflow.org.
- 483 **Akhund-Zade J**, Ho S, O'Leary C, de Bivort BL. The effect of environmental enrichment on behavioral variability  
484 depends on genotype, behavior, and type of enrichment. *bioRxiv*. 2019; p. 557181.
- 485 **Alisch T**, Crall JD, Kao AB, Zucker D, de Bivort BL. MAPLE (modular automated platform for large-scale experi-  
486 ments), a robot for integrated organism-handling and phenotyping. *eLife*. 2018; 7:e37166.
- 487 **Anderson DJ**, Perona P. Toward a science of computational ethology. *Neuron*. 2014; 84(1):18–31.
- 488 **Andriluka M**, Iqbal U, Insafutdinov E, Pishchulin L, Milan A, Gall J, Schiele B. PoseTrack: A benchmark for human  
489 pose estimation and tracking. In: *Proceedings of the IEEE Conference on Computer Vision and Pattern Recognition*;  
490 2018. p. 5167–5176.
- 491 **Andriluka M**, Pishchulin L, Gehler P, Schiele B. 2D Human Pose Estimation: New Benchmark and State of the  
492 Art Analysis. In: *IEEE Conference on Computer Vision and Pattern Recognition (CVPR)*; 2014. .
- 493 **Ayinde BO**, Zurada JM. Building efficient convnets using redundant feature pruning. *arXiv preprint*  
494 *arXiv:180207653*. 2018; .
- 495 **Ayroles JF**, Buchanan SM, O'Leary C, Skutt-Kakaria K, Grenier JK, Clark AG, Hartl DL, de Bivort BL. Behavioral  
496 idiosyncrasy reveals genetic control of phenotypic variability. *Proceedings of the National Academy of*  
497 *Sciences*. 2015; 112(21):6706–6711.
- 498 **Badrinarayanan V**, Kendall A, Cipolla R. SegNet: A Deep Convolutional Encoder-Decoder Architecture for Image  
499 Segmentation. *CoRR*. 2015; abs/1511.00561. <http://arxiv.org/abs/1511.00561>.
- 500 **Bath DE**, Stowers JR, Hörmann D, Poehlmann A, Dickson BJ, Straw AD. FlyMAD: rapid thermogenetic control of  
501 neuronal activity in freely walking *Drosophila*. *Nature methods*. 2014; 11(7):756.
- 502 **Berman GJ**. Measuring behavior across scales. *BMC biology*. 2018; 16(1):23.
- 503 **Berman GJ**, Bialek W, Shaevitz JW. Predictability and hierarchy in *Drosophila* behavior. *Proceedings of the*  
504 *National Academy of Sciences*. 2016; 113(42):11943–11948.
- 505 **Berman GJ**, Choi DM, Bialek W, Shaevitz JW. Mapping the stereotyped behaviour of freely moving fruit flies.  
506 *Journal of The Royal Society Interface*. 2014; 11(99):20140672.
- 507 **Berman GJ**, Choi DM, Bialek W, Shaevitz JW. Mapping the structure of drosophilid behavior. *bioRxiv*. 2014; p.  
508 002873.
- 509 **Bierbach D**, Laskowski KL, Wolf M. Behavioural individuality in clonal fish arises despite near-identical rearing  
510 conditions. *Nature communications*. 2017; 8:15361.
- 511 **Boenisch F**, Rosemann B, Wild B, Dormagen D, Wario F, Landgraf T. Tracking All Members of a Honey Bee  
512 Colony Over Their Lifetime Using Learned Models of Correspondence. *Frontiers in Robotics and AI*. 2018;  
513 5:35. <https://www.frontiersin.org/article/10.3389/frobt.2018.00035>, doi: 10.3389/frobt.2018.00035.
- 514 **Brown AE**, De Bivort B. Ethology as a physical science. *Nature Physics*. 2018; p. 1.

- 515 **Cande J**, Namiki S, Qiu J, Korff W, Card GM, Shaevitz JW, Stern DL, Berman GJ. Optogenetic dissection of  
516 descending behavioral control in *Drosophila*. *Elife*. 2018; 7:e34275.
- 517 **Cao Z**, Simon T, Wei SE, Sheikh Y. Realtime multi-person 2d pose estimation using part affinity fields. In:  
518 *Proceedings of the IEEE Conference on Computer Vision and Pattern Recognition*; 2017. p. 7291–7299.
- 519 **Carpenter B**, Lee D, Brubaker MA, Riddell A, Gelman A, Goodrich B, Guo J, Hoffman M, Betancourt M, Li P. Stan:  
520 A Probabilistic Programming Language. *J Stat Softw*. 2017; .
- 521 **Cauchy A**. Méthode générale pour la résolution des systemes d'équations simultanées. *Comp Rend Sci Paris*.  
522 1847; 25(1847):536–538.
- 523 **Chen Y**, Shen C, Wei XS, Liu L, Yang J. Adversarial poseNet: A structure-aware convolutional network for human  
524 pose estimation. In: *Proceedings of the IEEE International Conference on Computer Vision*; 2017. p. 1212–1221.
- 525 **Chollet F**, et al., Keras. GitHub; 2015. <https://github.com/fchollet/keras>.
- 526 **Chollet F**. Xception: Deep learning with depthwise separable convolutions. In: *Proceedings of the IEEE conference*  
527 *on computer vision and pattern recognition*; 2017. p. 1251–1258.
- 528 **Costa AC**, Ahamed T, Stephens GJ. Adaptive, locally linear models of complex dynamics. *Proceedings of the*  
529 *National Academy of Sciences*. 2019; 116(5):1501–1510. <https://www.pnas.org/content/116/5/1501>, doi:  
530 [10.1073/pnas.1813476116](https://doi.org/10.1073/pnas.1813476116).
- 531 **Crall JD**, Gravish N, Mountcastle AM, Combes SA. BEETag: a low-cost, image-based tracking system for the study  
532 of animal behavior and locomotion. *PloS one*. 2015; 10(9):e0136487.
- 533 **Dell AI**, Bender JA, Branson K, Couzin ID, de Polavieja GG, Noldus LP, Pérez-Escudero A, Perona P, Straw AD,  
534 Wikelski M, et al. Automated image-based tracking and its application in ecology. *Trends in ecology &*  
535 *evolution*. 2014; 29(7):417–428.
- 536 **Deng J**, Dong W, Socher R, Li LJ, Li K, Fei-Fei L. Imagenet: A large-scale hierarchical image database. . 2009; .
- 537 **Doudna JA**, Charpentier E. The new frontier of genome engineering with CRISPR-Cas9. *Science*. 2014;  
538 346(6213):1258096.
- 539 **Duane S**, Kennedy AD, Pendleton BJ, Roweth D. Hybrid Monte Carlo. *Phys Lett B*. 1987; 195(2):216–222.
- 540 **Dugas C**, Bengio Y, Bélisle F, Nadeau C, Garcia R. Incorporating second-order functional knowledge for better  
541 option pricing. In: *Advances in neural information processing systems*; 2001. p. 472–478.
- 542 **Flack A**, Nagy M, Fiedler W, Couzin ID, Wikelski M. From local collective behavior to global migratory patterns in  
543 white storks. *Science*. 2018; 360(6391):911–914.
- 544 **Francisco FA**, Nührenberg P, Jordan AL. A low-cost, open-source framework for tracking and behavioural analysis  
545 of animals in aquatic ecosystems. *bioRxiv*. 2019; <https://www.biorxiv.org/content/early/2019/03/09/571232>,  
546 doi: 10.1101/571232.
- 547 **Goodfellow I**, Bengio Y, Courville A. Deep learning. MIT press; 2016.
- 548 **Graving JM**, pinpoint: behavioral tracking using 2D barcode tags v0.0.1-alpha; 2017. [https://doi.org/10.5281/](https://doi.org/10.5281/zenodo.1008970)  
549 [zenodo.1008970](https://doi.org/10.5281/zenodo.1008970), doi: [10.5281/zenodo.1008970](https://doi.org/10.5281/zenodo.1008970).
- 550 **Guizar-Sicairos M**, Thurman ST, Fienup JR. Efficient subpixel image registration algorithms. *Optics letters*. 2008;  
551 33(2):156–158.
- 552 **He K**, Zhang X, Ren S, Sun J. Deep residual learning for image recognition. In: *Proceedings of the IEEE conference*  
553 *on computer vision and pattern recognition*; 2016. p. 770–778.
- 554 **Hoffman MD**, Gelman A. The No-U-Turn sampler: adaptively setting path lengths in Hamiltonian Monte Carlo.  
555 *Journal of Machine Learning Research*. 2014; 15(1):1593–1623.
- 556 **Huang G**, Liu Z, Van Der Maaten L, Weinberger KQ. Densely connected convolutional networks. In: *Proceedings*  
557 *of the IEEE conference on computer vision and pattern recognition*; 2017. p. 4700–4708.
- 558 **Huang J**, Rathod V, Sun C, Zhu M, Korattikara A, Fathi A, Fischer I, Wojna Z, Song Y, Guadarrama S, et al.  
559 Speed/accuracy trade-offs for modern convolutional object detectors. In: *Proceedings of the IEEE conference on*  
560 *computer vision and pattern recognition*; 2017. p. 7310–7311.

- 561 **Insafutdinov E**, Pishchulin L, Andres B, Andriluka M, Schiele B. Deepcut: A deeper, stronger, and faster  
562 multi-person pose estimation model. In: *European Conference on Computer Vision* Springer; 2016. p. 34–50.
- 563 **Iqbal U**, Milan A, Gall J. PoseTrack: Joint multi-person pose estimation and tracking. In: *Proceedings of the IEEE*  
564 *Conference on Computer Vision and Pattern Recognition*; 2017. p. 2011–2020.
- 565 **Jégou S**, Drozdal M, Vázquez D, Romero A, Bengio Y. The One Hundred Layers Tiramisu: Fully Convolutional  
566 DenseNets for Semantic Segmentation. CoRR. 2017; abs/1611.09326. <http://arxiv.org/abs/1611.09326>.
- 567 **Johnson M**, Duvenaud DK, Wiltchko A, Adams RP, Datta SR. Composing graphical models with neural networks  
568 for structured representations and fast inference. In: *Advances in neural information processing systems*; 2016.  
569 p. 2946–2954.
- 570 **Jolles JW**, Boogert NJ, Sridhar VH, Couzin ID, Manica A. Consistent individual differences drive collective behavior  
571 and group functioning of schooling fish. *Current Biology*. 2017; 27(18):2862–2868.
- 572 **Jung A**, imgaug. GitHub; 2018. <https://github.com/aleju/imgaug>.
- 573 **Kain J**, Stokes C, Gaudry Q, Song X, Foley J, Wilson R, De Bivort B. Leg-tracking and automated behavioural  
574 classification in *Drosophila*. *Nature communications*. 2013; 4:1910.
- 575 **Kain JS**, Stokes C, de Bivort BL. Phototactic personality in fruit flies and its suppression by serotonin and white.  
576 *Proceedings of the National Academy of Sciences*. 2012; 109(48):19834–19839.
- 577 **Kays R**, Crofoot MC, Jetz W, Wikelski M. Terrestrial animal tracking as an eye on life and planet. *Science*. 2015;  
578 348(6240):aaa2478.
- 579 **Ke L**, Chang MC, Qi H, Lyu S. Multi-Scale Structure-Aware Network for Human Pose Estimation. In: *The European*  
580 *Conference on Computer Vision (ECCV)*; 2018. .
- 581 **Kendall A**, Gal Y. What uncertainties do we need in bayesian deep learning for computer vision? In: *Advances in*  
582 *neural information processing systems*; 2017. p. 5574–5584.
- 583 **Kiefer J**, Wolfowitz J, et al. Stochastic estimation of the maximum of a regression function. *The Annals of*  
584 *Mathematical Statistics*. 1952; 23(3):462–466.
- 585 **Kingma DP**, Ba J. Adam: A method for stochastic optimization. arXiv preprint arXiv:1412.6980. 2014; .
- 586 **Klambauer G**, Unterthiner T, Mayr A, Hochreiter S. Self-normalizing neural networks. In: *Advances in neural*  
587 *information processing systems*; 2017. p. 971–980.
- 588 **Klibaite U**, Berman GJ, Cande J, Stern DL, Shaevitz JW. An unsupervised method for quantifying the behavior of  
589 paired animals. *Physical biology*. 2017; 14(1):015006.
- 590 **Klibaite U**, Shaevitz JW. Interacting fruit flies synchronize behavior. bioRxiv. 2019; p. 545483.
- 591 **Krakauer JW**, Ghazanfar AA, Gomez-Marin A, MacIver MA, Poeppel D. Neuroscience needs behavior: correcting  
592 a reductionist bias. *Neuron*. 2017; 93(3):480–490.
- 593 **Kuhn M**, Johnson K. Applied predictive modeling, vol. 26. Springer; 2013.
- 594 **LeCun Y**, Bengio Y, Hinton G. Deep learning. *nature*. 2015; 521(7553):436.
- 595 **Li H**, Xu Z, Taylor G, Studer C, Goldstein T. Visualizing the loss landscape of neural nets. In: *Advances in Neural*  
596 *Information Processing Systems*; 2018. p. 6391–6401.
- 597 **Long J**, Shelhamer E, Darrell T. Fully convolutional networks for semantic segmentation. In: *Proceedings of the*  
598 *IEEE conference on computer vision and pattern recognition*; 2015. p. 3431–3440.
- 599 **Markowitz JE**, Gillis WF, Beron CC, Neufeld SQ, Robertson K, Bhagat ND, Peterson RE, Peterson E, Hyun M,  
600 Linderman SW, et al. The striatum organizes 3D behavior via moment-to-moment action selection. *Cell*. 2018;  
601 174(1):44–58.
- 602 **Mathis A**, Mamidanna P, Cury KM, Abe T, Murthy VN, Mathis MW, Bethge M. DeepLabCut: markerless pose  
603 estimation of user-defined body parts with deep learning. *Nature Neuroscience*. 2018; <https://www.nature.com/articles/s41593-018-0209-y>.
- 604



- 605 **Mathis A**, Warren RA. On the inference speed and video-compression robustness of DeepLabCut. bioRxiv.  
606 2018; <https://www.biorxiv.org/content/early/2018/10/30/457242>, doi: 10.1101/457242.
- 607 **Mendes CS**, Bartos I, Akay T, Márka S, Mann RS. Quantification of gait parameters in freely walking wild type  
608 and sensory deprived *Drosophila melanogaster*. *elife*. 2013; 2:e00231.
- 609 **Nagy M**, Akos Z, Biro D, Vicsek T. Hierarchical group dynamics in pigeon flocks. *Nature*. 2010; 464(7290):890.
- 610 **Nagy M**, Vásárhelyi G, Pettit B, Roberts-Mariani I, Vicsek T, Biro D. Context-dependent hierarchies in pigeons.  
611 *Proceedings of the National Academy of Sciences*. 2013; 110(32):13049–13054.
- 612 **Nath T**, Mathis A, Chen AC, Patel A, Bethge M, Mathis MW. Using DeepLabCut for 3D markerless pose estimation  
613 across species and behaviors. bioRxiv. 2018; <https://www.biorxiv.org/content/early/2018/11/24/476531>, doi:  
614 10.1101/476531.
- 615 **Newell A**, Yang K, Deng J. Stacked Hourglass Networks for Human Pose Estimation. CoRR. 2016; abs/1603.06937.  
616 <http://arxiv.org/abs/1603.06937>.
- 617 **Pereira TD**, Aldarondo DE, Willmore L, Kislin M, Wang SSH, Murthy M, Shaevitz JW. Fast animal pose estimation  
618 using deep neural networks. *Nature methods*. 2019; 16(1):117.
- 619 **Pérez-Escudero A**, Vicente-Page J, Hinz RC, Arganda S, De Polavieja GG. idTracker: tracking individuals in a  
620 group by automatic identification of unmarked animals. *Nature methods*. 2014; 11(7):743.
- 621 **Pratt LY**. Discriminability-based transfer between neural networks. In: *Advances in neural information processing*  
622 *systems*; 1993. p. 204–211.
- 623 **Prechelt L**. Automatic early stopping using cross validation: quantifying the criteria. *Neural Networks*. 1998;  
624 11(4):761–767.
- 625 **Ran FA**, Hsu PD, Wright J, Agarwala V, Scott DA, Zhang F. Genome engineering using the CRISPR-Cas9 system.  
626 *Nature protocols*. 2013; 8(11):2281.
- 627 **Robbins H**, Monro S. A stochastic approximation method. *The annals of mathematical statistics*. 1951; p.  
628 400–407.
- 629 **Romero-Ferrero F**, Bergomi MG, Hinz R, Heras FJ, de Polavieja GG. idtracker. ai: Tracking all individuals in large  
630 collectives of unmarked animals. arXiv preprint arXiv:180304351. 2018; .
- 631 **Ronneberger O**, Fischer P, Brox T. U-net: Convolutional networks for biomedical image segmentation. In:  
632 *International Conference on Medical image computing and computer-assisted intervention* Springer; 2015. p.  
633 234–241.
- 634 **Rosenthal SB**, Twomey CR, Hartnett AT, Wu HS, Couzin ID. Revealing the hidden networks of interaction in  
635 mobile animal groups allows prediction of complex behavioral contagion. *Proceedings of the National*  
636 *Academy of Sciences*. 2015; 112(15):4690–4695.
- 637 **Roy AG**, Conjeti S, Navab N, Wachinger C. Bayesian QuickNAT: Model Uncertainty in Deep Whole-Brain Segmen-  
638 tation for Structure-wise Quality Control. CoRR. 2018; abs/1811.09800. <http://arxiv.org/abs/1811.09800>.
- 639 **Sabour S**, Frosst N, Hinton GE. Dynamic routing between capsules. In: *Advances in neural information processing*  
640 *systems*; 2017. p. 3856–3866.
- 641 **Sandler M**, Howard A, Zhu M, Zhmoginov A, Chen LC. Mobilenetv2: Inverted residuals and linear bottlenecks.  
642 In: *Proceedings of the IEEE Conference on Computer Vision and Pattern Recognition*; 2018. p. 4510–4520.
- 643 **Schiffman R**, Drones flying high as new tool for field biologists. *American Association for the Advancement of*  
644 *Science*; 2014.
- 645 **Stowers JR**, Hofbauer M, Bastien R, Griessner J, Higgins P, Farooqui S, Fischer RM, Nowikovsky K, Haubensak W,  
646 Couzin ID, et al. Virtual reality for freely moving animals. *Nature methods*. 2017; 14(10):995.
- 647 **Strandburg-Peshkin A**, Farine DR, Couzin ID, Crofoot MC. Shared decision-making drives collective movement  
648 in wild baboons. *Science*. 2015; 348(6241):1358–1361.
- 649 **Strandburg-Peshkin A**, Farine DR, Crofoot MC, Couzin ID. Habitat and social factors shape individual decisions  
650 and emergent group structure during baboon collective movement. *Elife*. 2017; 6:e19505.

- 651 **Strandburg-Peshkin A**, Twomey CR, Bode NW, Kao AB, Katz Y, Ioannou CC, Rosenthal SB, Torney CJ, Wu HS,  
652 Levin SA, et al. Visual sensory networks and effective information transfer in animal groups. *Current Biology*.  
653 2013; 23(17):R709–R711.
- 654 **Todd JG**, Kain JS, de Bivort BL. Systematic exploration of unsupervised methods for mapping behavior. *Physical*  
655 *biology*. 2017; 14(1):015002.
- 656 **Tran D**, Hoffman MW, Moore D, Suter C, Vasudevan S, Radul A. Simple, distributed, and accelerated probabilistic  
657 programming. In: *Advances in Neural Information Processing Systems*; 2018. p. 7609–7620.
- 658 **Uhlmann V**, Ramdya P, Delgado-Gonzalo R, Benton R, Unser M. FlyLimbTracker: An active contour based  
659 approach for leg segment tracking in unmarked, freely behaving *Drosophila*. *PLoS One*. 2017; 12(4):e0173433.
- 660 **Weigert M**, Schmidt U, Boothe T, Müller A, Dibrov A, Jain A, Wilhelm B, Schmidt D, Broaddus C, Culley S, et al.  
661 Content-aware image restoration: pushing the limits of fluorescence microscopy. *Nature methods*. 2018;  
662 15(12):1090.
- 663 **Werkhoven Z**, Rohrsen C, Qin C, Brembs B, de Bivort B. MARGO (Massively Automated Real-time GUI for  
664 Object-tracking), a platform for high-throughput ethology. *BioRxiv*. 2019; p. 593046.
- 665 **Wild B**, Sixt L, Landgraf T. Automatic localization and decoding of honeybee markers using deep convolutional  
666 neural networks. *CoRR*. 2018; abs/1802.04557. <http://arxiv.org/abs/1802.04557>.
- 667 **Wiltschko AB**, Johnson MJ, Iurilli G, Peterson RE, Katon JM, Pashkovski SL, Abaira VE, Adams RP, Datta SR.  
668 Mapping sub-second structure in mouse behavior. *Neuron*. 2015; 88(6):1121–1135.

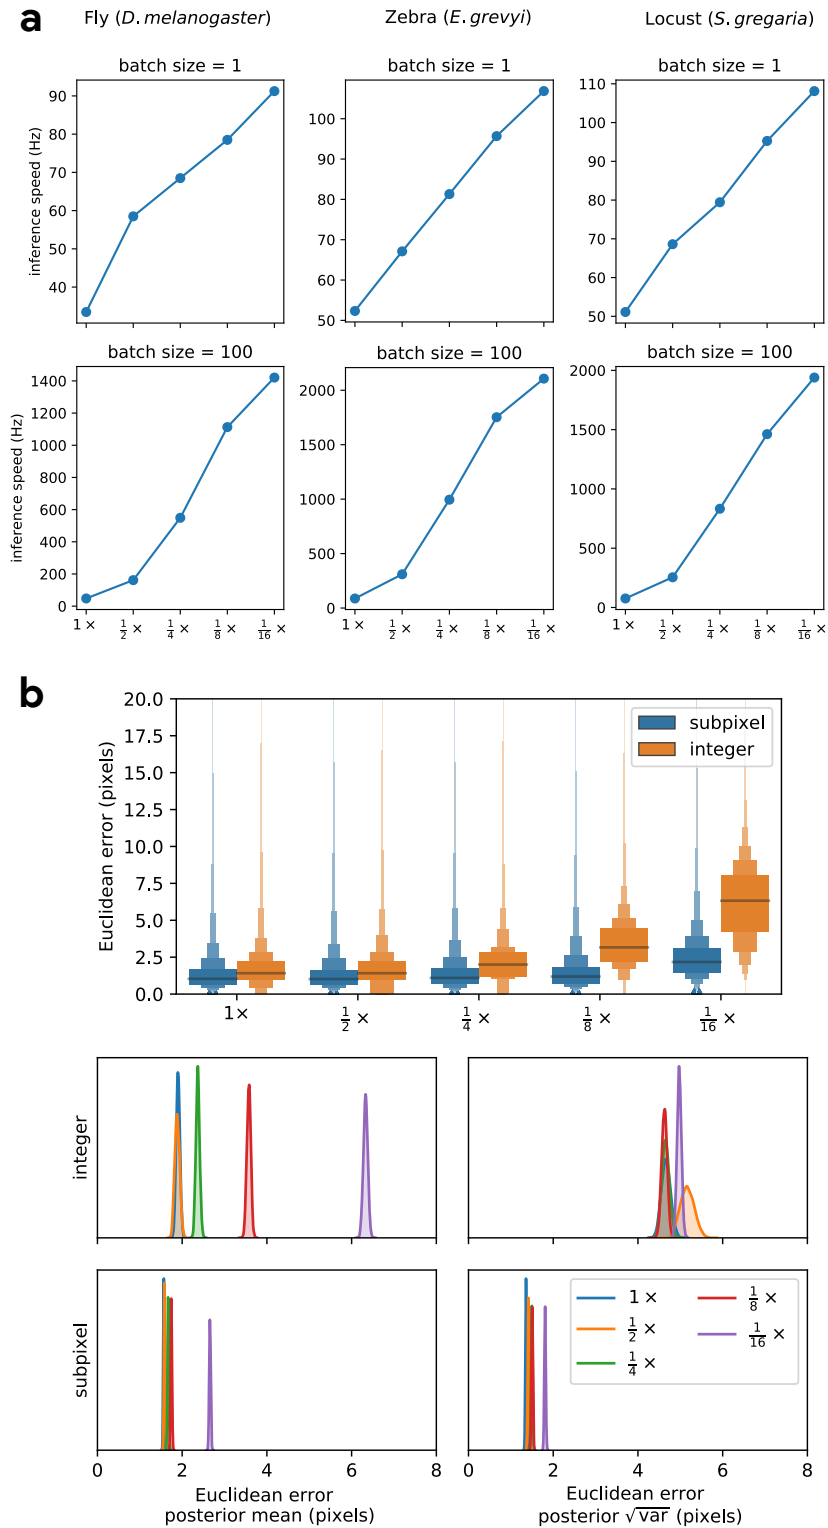

**Appendix 0 Figure 5.** Our subpixel maxima algorithm increases speed **(a)** without decreasing accuracy **(b)**. Inference speed is fast and can be run in real-time on single images (batch size = 1) at ~30-110Hz. Plots show the inference speeds for our Stacked DenseNet model across downsampling configurations for each of our datasets **(a)**. Prediction accuracy on the fly dataset is maintained across downsampling configurations **(b)**. Letter-value plots **(top)** show the raw error distributions for each configuration. Visualizations of the posterior distributions for the mean and variance **(bottom)** illustrate statistical differences between the error distributions, where using subpixel maxima decreases both the mean and variance of the error distribution.

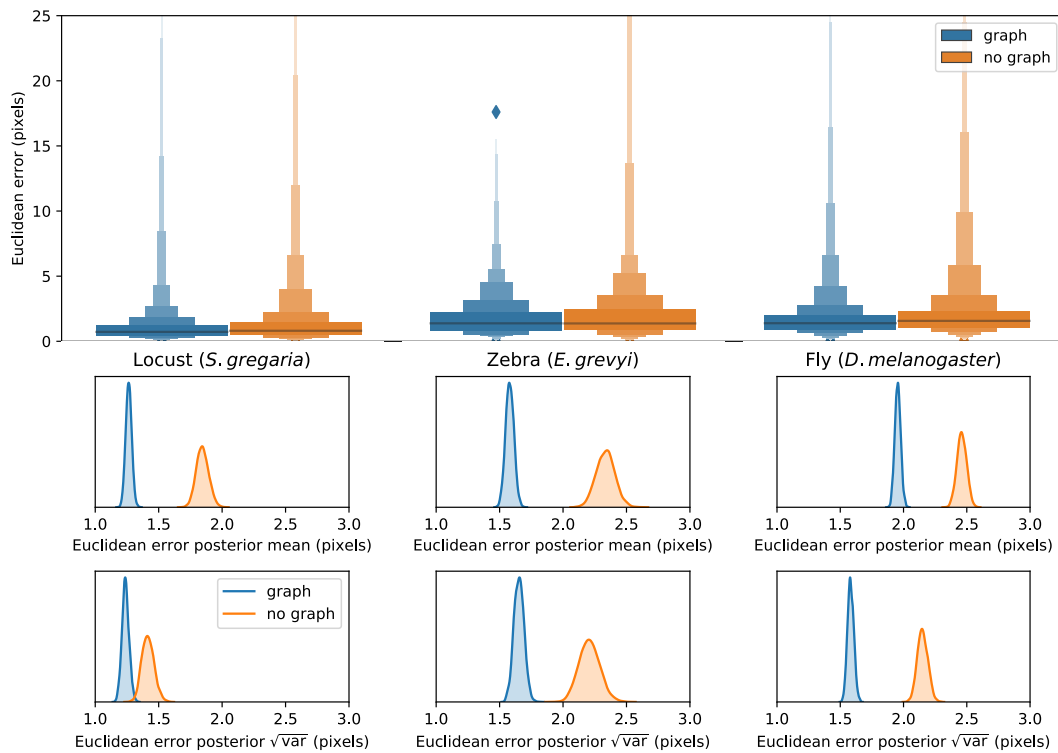

**Appendix 0 Figure 6.** Predicting the global geometry of the posture graph reduces error. Letter-value plots (**top**) show the raw error distributions for each experiment. Visualizations of the posterior distributions for the mean and variance (**bottom**) show statistical differences between the error distributions. Predicting the posture graph decreases both the mean and variance of the error distribution.

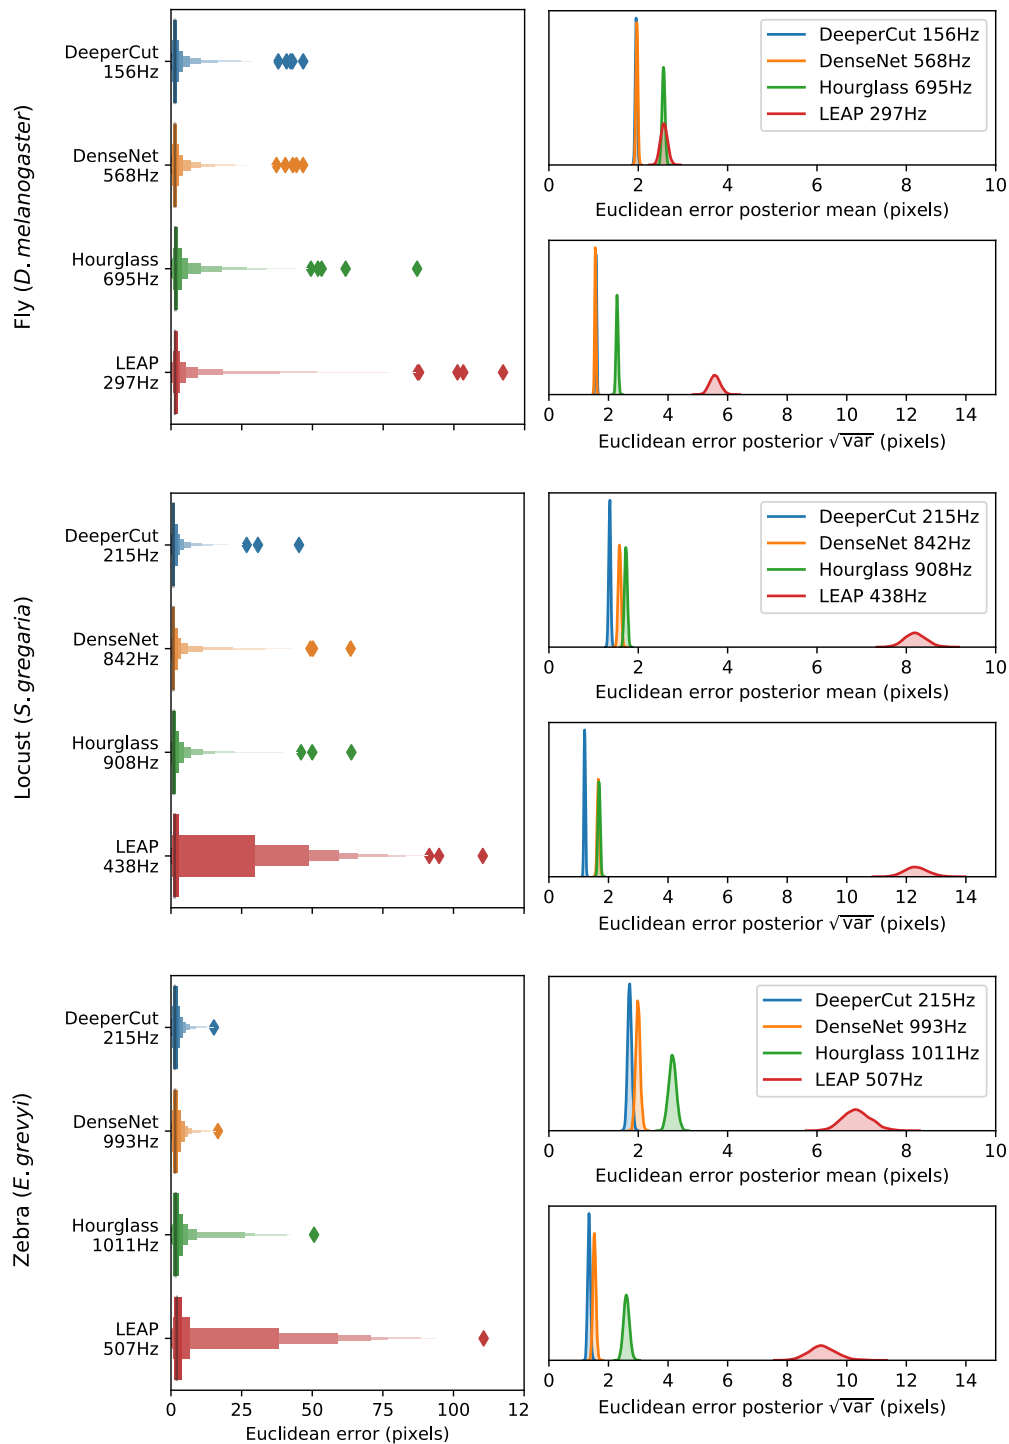

**Appendix 0 Figure 7.** Euclidean error distributions for each model across our three datasets. Letter-value plots (**left**) show the raw error distributions for each model. Histograms of the posterior distributions for the mean and variance (**right**) show statistical differences between the error distributions. Overall the LEAP model from [Pereira et al. \(2019\)](#) was the worst performer on every dataset in terms of both mean and variance. The DeeperCut model from [Insafutdinov et al. \(2016\)](#) was the best performer on every dataset followed closely by our implementation of Stacked DenseNet ([Jégou et al., 2017](#)) and Stacked Hourglass ([Newell et al., 2016](#)). The posteriors for [Insafutdinov et al. \(2016\)](#) and our Stacked DenseNet model overlap almost completely for the fly dataset.

## 669 Appendix 1

### 670 Convolutional neural networks (CNNs)

671 *Artificial neural networks* like CNNs are complex, non-linear regression models that "learn"  
672 a hierarchically-organized set of parameters from real-world data via optimization. These  
673 machine learning models are now commonplace in science and industry and have proven  
674 to be surprisingly effective for a large number of applications where more conventional  
675 statistical models have failed (**LeCun et al., 2015**). For computer vision tasks, CNN parameters  
676 typically take the form of two-dimensional convolutional filters that are optimized to detect  
677 spatial features needed to model relationships between high-dimensional image data and  
678 some related variable(s) of interest, such as locations in space—e.g. posture keypoints—or  
679 semantic labels (**Long et al., 2015; Badrinarayanan et al., 2015**).

680 Once a training set is generated (Appendix 2), a CNN model must be selected and  
681 optimized to perform the prediction task. CNNs are incredibly flexible with regard to how  
682 models are specified and trained, which is both an advantage and a disadvantage. This  
683 flexibility means models can be adapted to almost any computer vision task, but it also  
684 means the number of possible model architectures and optimization schemes is very large.  
685 This can make selecting an architecture and specifying hyperparameters a challenging  
686 process. However, most research on pose estimation has converged on a set of models that  
687 generally work well for this task (Appendix 3).

688 After selecting an architecture, the parameters of the model are set to an initial value and  
689 then iteratively updated to minimize some objective function, or *loss function*, that describes  
690 the difference between the model's predictive distribution and the true distribution of the  
691 data—in other words, the likelihood of the model's output is maximized. These parameter  
692 updates are performed using a modified version of the gradient descent algorithm (**Cauchy  
693 1847**) known as *mini-batch stochastic gradient descent*—often referred to as simply *stochastic  
694 gradient descent* or *SGD* (**Robbins and Monro, 1951; Kiefer et al., 1952**). SGD iteratively  
695 optimizes the model parameters using small randomly-selected subsamples, or *batches*,  
696 of training data. Using SGD allows the model to be trained on extremely large datasets  
697 in an iterative "online" fashion without the need to load the entire dataset into memory.  
698 The model parameters are updated with each batch by adjusting the parameter values in  
699 a direction that minimizes the error—where one round of training on the full dataset is  
700 commonly referred to as an *epoch*. The original SGD algorithm requires careful selection and  
701 tuning of hyperparameters to successfully optimize a model, but modern versions of the  
702 algorithm, such as *ADAM* (**Kingma and Ba, 2014**), automatically tune these hyperparameters,  
703 which makes optimization more straightforward.

704 The model parameters are optimized until they reach a convergence criterion, which  
705 is some measure of performance that indicates the model has reached a good location in  
706 parameter space. The most commonly used convergence criterion is a measure of predictive  
707 accuracy—often the loss function used for optimization—on a held-out *validation set*—a  
708 subsample of the training data not used for optimization—that evaluates the model's ability  
709 to generalize to new "out-of-sample" data. The model is typically evaluated at the end of  
710 each training epoch to assess performance on the validation set. Once performance on  
711 the validation set stops improving, training is usually stopped to prevent the model from  
712 overfitting to the training set—a technique known as *early stopping* (**Prechelt, 1998**).

## 713 Appendix 2

### 714 Collecting training data

715 Depending on the variability of the data, CNNs usually require thousands or tens of thou-  
716 sands of manually-annotated examples in order to reach human-level accuracy. However, in  
717 laboratory settings, sources of image variation like lighting and spatial scale can be more  
718 easily controlled, which minimizes the number of training examples needed to achieve  
719 accurate predictions.

720 This need for a large training set can be further reduced in a number of ways. Two  
721 commonly used methods include (1) *transfer learning*—using a model with parameters that  
722 are pre-trained on a larger set of images, such as the ImageNet database (*Deng et al., 2009*),  
723 containing diverse features (*Pratt, 1993; Insafutdinov et al., 2016; Mathis et al., 2018*)—  
724 and (2) *augmentation*—artificially increasing data variance by applying spatial and noise  
725 transformations such as flipping (mirroring), rotating, scaling, and adding different forms  
726 of noise or artificial occlusions. Both of these methods act as useful forms of *regulariza-*  
727 *tion*—incorporating a prior distribution—that allows the model to generalize well to new  
728 data even when the training set is small. Transfer learning incorporates prior information  
729 that images from the full dataset should contain statistical features similar to other images  
730 of the natural world, while augmentation incorporates prior knowledge that animals are  
731 bilaterally symmetric, can vary in their body size, position, and orientation, and that noise  
732 and occlusions sometimes occur.

733 *Pereira et al. (2019)* introduced two especially clever solutions for collecting an adequate  
734 training set. First, they cluster unannotated images based on pixel variance and uniformly  
735 sample images from each cluster, which reduces correlation between training examples  
736 and ensures the training data are representative of the entire distribution of possible  
737 images. Second, they use *active learning* where a CNN is trained on a small number of  
738 annotated examples and is then used to initialize keypoint locations for a larger set of  
739 unannotated data. These pre-initialized data are then manually corrected by the annotator,  
740 the model is retrained, and the unannotated data are re-initialized. The annotator applies  
741 this process iteratively as the training set grows larger until they are providing only minor  
742 adjustments to the pre-initialized data. This “human-in-the-loop”-style annotation expedites  
743 the process of generating an adequately large training set by reducing the cognitive load  
744 on the annotator—where the pose estimation model serves as a “cognitive partner”. Such  
745 a strategy also allows the annotator to automatically select new training examples based  
746 on the performance of the current iteration—where low-confidence predictions indicate  
747 examples that should be annotated for maximum improvement (Figure 1).

748 Of course, annotating image data requires software made for this purpose. *Pereira*  
749 *et al. (2019)* provide a custom annotation GUI written in MATLAB specifically designed for  
750 annotating posture using an active learning strategy. *Mathis et al. (2018)* originally did not  
751 provide an annotation tool, but recently added a Python-based GUI in an updated version  
752 of their software—including active learning and image sampling methods (see *Nath et al.*  
753 *2018*). Our framework also includes a Python-based GUI for annotating data with similar  
754 features to *Mathis et al. (2018)* and *Pereira et al. (2019)*.

## 755 Appendix 3

### 756 Fully-convolutional regression

757 For the task of pose estimation, a CNN is optimized to predict the locations of postural  
758 keypoints in an image. One approach is to use a CNN to directly predict the numerical  
759 value of each keypoint coordinate as an output. However, making predictions in this way  
760 removes real-world constraints on the model's predictive distribution by destroying spatial  
761 relationships within images, which negates many of the advantages of using CNNs in the  
762 first place.

763 CNNs are particularly good at transforming one image to produce another related  
764 image, or set of images, while preserving spatial relationships and allowing for translation-  
765 invariant predictions—a configuration known as a *fully-convolutional neural network* or *F-  
766 CNN* (Long et al., 2015). Therefore, instead of directly regressing images to coordinate  
767 values, a popular solution (Newell et al., 2016; Insafutdinov et al., 2016; Mathis et al., 2018;  
768 Pereira et al., 2019) is to optimize a F-CNN that transforms images to predict a stack of  
769 output images known as *confidence maps*—one for each keypoint. Each confidence map in  
770 the output volume contains a single, two-dimensional, symmetric Gaussian indicating the  
771 location of each joint, and the scalar value of the peak indicates the confidence score of the  
772 prediction—typically a value between 0 and 1. The confidence maps are then processed to  
773 produce the coordinates of each keypoint.

774 In the case of *multiple pose estimation* where an image contains many individuals, the  
775 global geometry of the posture graph is also predicted by training the model to produce *part  
776 affinity fields* (Cao et al., 2017)—vector fields drawn between joints in the posture graph—or  
777 *pairwise terms* (Insafutdinov et al., 2016)—vector fields of the conditional distributions  
778 between posture keypoints (e.g.  $p(\text{foot}|\text{head})$ ). This allows multiple posture graphs to be  
779 disentangled from the image using graph partitioning as the vector fields indicate the  
780 probability of the connection between joints (see Cao et al. 2017 for details).



782

## Box 1. Encoder-decoder models

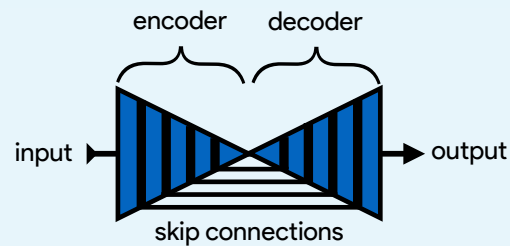

783

784

785

**Box 1 Figure 1.** An illustration of the basic encoder-decoder design. The encoder converts the input images into spatial features, and the decoder transforms spatial features to the desired output.

786

787

788

789

790

791

792

793

794

795

A popular type of F-CNN (Appendix 3) for solving posture regression problems is known as an *encoder-decoder* model (Figure 1), which first gained popularity for the task of semantic segmentation—a supervised computer vision problem where each pixel in an image is classified into a one of several labeled categories like “dog”, “tree”, or “road” (Long et al., 2015). This model is designed to repeatedly convolve and downsample input images in the bottom-up *encoder* step and then convolve and upsample the encoder’s output in the top-down *decoder* step to produce the final output. Repeatedly applying convolutions and non-linear functions, or *activations*, to the input images transforms pixel values into higher-order spatial features, while downsampling and upsampling respectively increases and decreases the scale and complexity of these features.

796

797

798

799

800

801

802

803

804

805

806

807

**Badrinarayanan et al. (2015)** were the first to popularize a form of this model—known as *SegNet*—for semantic segmentation. However, this basic design is inherently limited because the decoder relies solely on the downsampled output from the encoder, which restricts the features used for predictions to those with the largest spatial scale and highest complexity. For example, a very deep network might learn a complex spatial pattern for predicting “grass” or “trees”, but because it cannot directly access information from the earliest layers of the network, it cannot use the simplest features that plants are green and brown. Subsequent work by **Ronneberger et al. (2015)** improved on these problems with the addition of *residual* or *skip connections* between the encoder and decoder, where feature maps from encoder layers are concatenated to those decoder layers with the same spatial scale. This set of connections then allows the optimizer, rather than the user, to select the most relevant spatial scale(s) for making predictions.

808

809

810

811

812

813

814

815

816

817

818

819

820

821

822

823

824

**Jégou et al. (2017)** are the latest to advance the encoder-decoder paradigm. These researchers introduced a fully-convolutional version of **Huang et al.’s (2017a)** *DenseNet* architecture known as a *fully-convolutional DenseNet*, or *FC-DenseNet*. FC-DenseNet’s key improvement is an elaborate set of feed-forward residual connections where the input to each convolutional layer is a concatenated stack of feature maps from *all previous layers*. This densely-connected design was motivated by the insight that many state-of-the-art models learn a large proportion of redundant features. Most CNNs are not designed so that the final output layers can access all feature maps in the network simultaneously, and this limitation causes these networks to “forget” and “relearn” important features as the input images are transformed to produce the output. In the case of the incredibly popular ResNet-101 (**He et al., 2016**) nearly 40% of the features can be classified as redundant (**Ayinde and Zurada, 2018**). A densely-connected architecture has the advantages of reduced feature redundancy, increased feature reuse, enhanced feature propagation from early layers to later layers, and subsequently, a *substantial reduction* in the number of parameters needed to achieve state-of-the-art results (**Huang et al., 2017a**). Recent work has also shown that DenseNet’s elaborate residual connections also have the pleasant side-effect of convexifying the loss landscape during optimization (**Li et al., 2018**), which allows for faster optimization and increases the likelihood of reaching a good optimum.

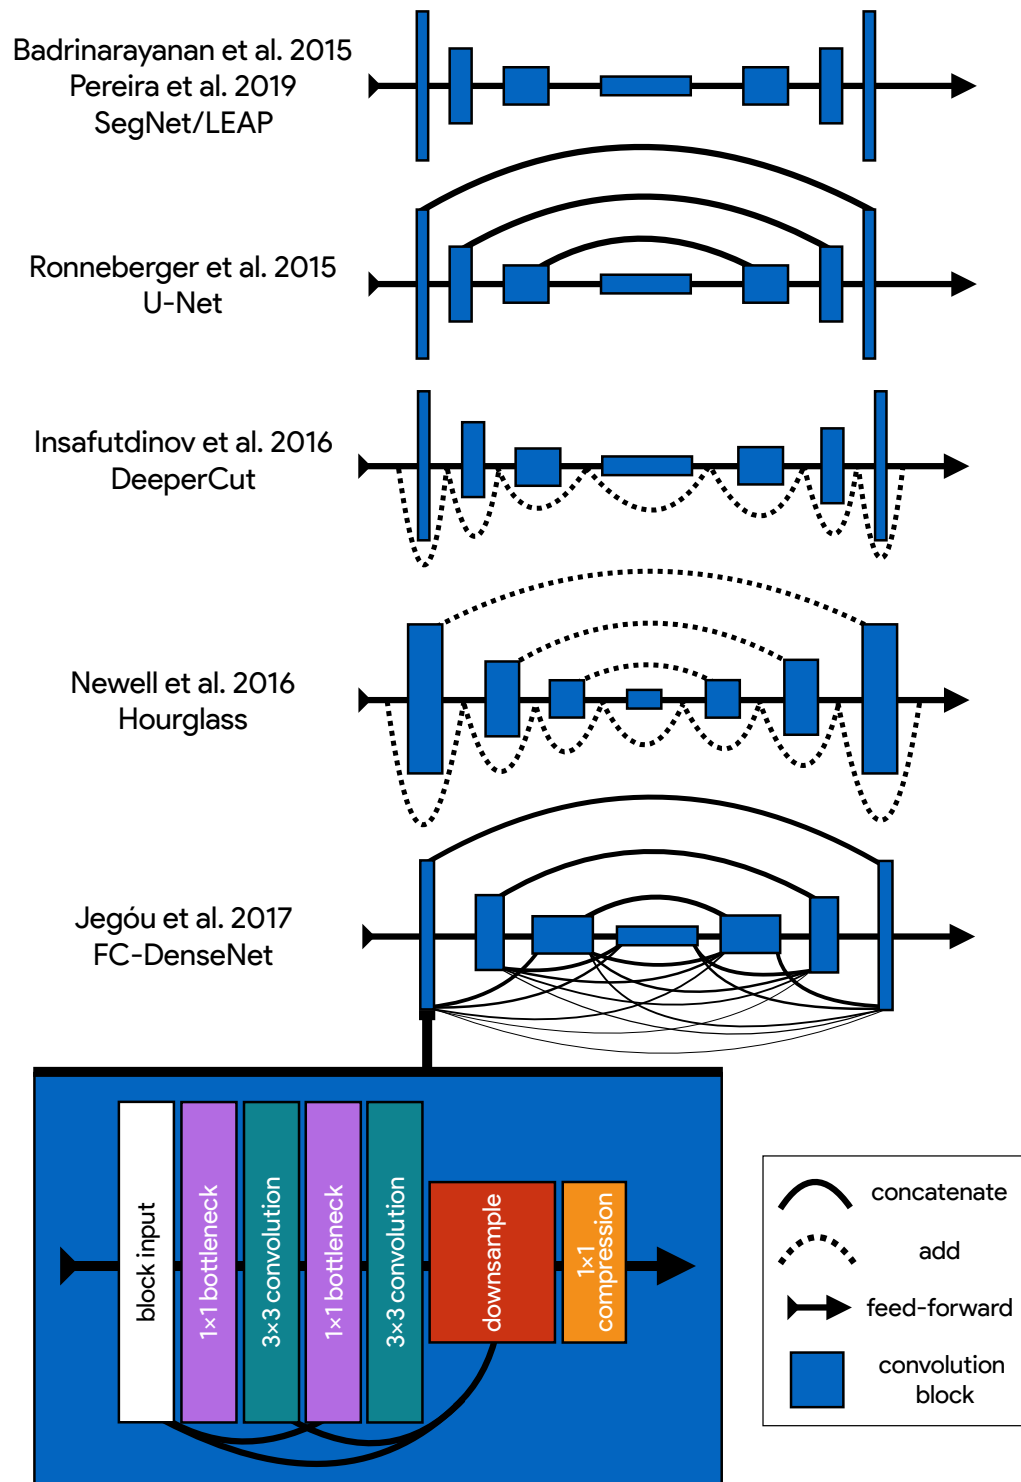

**Appendix 3 Figure 1.** An illustration showing the progression of encoder-decoder architectures from the literature—ordered by performance from top to bottom (see Appendix 3 Box 1 for further details). Most advances in performance have come from adding connections between layers in the network, culminating in FC-DenseNet from *Jégou et al. (2017)*. Lines in each illustration indicate connections between convolutional blocks with the thickness of the line indicating the magnitude of information flow between layers in the network. The size of each convolution block indicates the relative number of feature maps (width) and spatial scale (height). The callout for FC-DenseNet (*Jégou et al. 2017; bottom-left*) shows the elaborate set of skip connections within each densely-connected convolutional block as well as our additions of bottleneck and compression layers (described by *Huang et al. 2017a*) to increase efficiency (Appendix 8)

## 825 Appendix 4

### 826 Individual vs. multiple pose estimation

827 Most recent state-of-the-art methods for posture estimation now focus on simultaneously  
828 estimating the pose of multiple individuals in an image (e.g. **Cao et al. 2017**)—known as  
829 *multiple pose estimation*. However, the majority of work on multiple pose estimation has  
830 not adequately solved the tracking problem of linking individual data across frames in a  
831 video, especially after visual occlusions—although recent work has attempted to address this  
832 problem (**Iqbal et al., 2017; Andriluka et al., 2018**). Reliably tracking individuals is important  
833 for most behavioral studies, and there are a number of diverse methods already available for  
834 solving this problem (**Pérez-Escudero et al., 2014; Crall et al., 2015; Graving, 2017; Romero-**  
835 **Ferrero et al., 2018; Wild et al., 2018; Boenisch et al., 2018**). Therefore, to avoid solving  
836 an already-solved problem, the work we describe in this paper is purposefully limited to  
837 *individual pose estimation* where each image contains only a single focal individual—which  
838 may be localized and cropped from a larger multi-individual image.

839 We created a top-down posture estimation framework that can be easily adapted to  
840 any data collection workflow, which could include any method for localizing and tracking  
841 individuals. Limiting our methods in this way also simplifies the pose detection problem  
842 and the cognitive task of creating annotated data. Additionally, because individual pose  
843 estimation is such a well-studied problem in computer vision, we can build on the state-of-  
844 the-art for this task (see Appendices 3 and 5 for details).

## 845 Appendix 5

### 846 The state of the art for individual pose estimation

847 The current state of the art for individual posture estimation is *Newell et al. (2016)*— as well  
848 as the many iterations of this design (e.g. *Ke et al. 2018*, *Chen et al. 2017*; also see benchmark  
849 results from *Andriluka et al. 2014*). *Newell et al. (2016)* employ what they call a *Stacked*  
850 *Hourglass* network (Appendix 3 Figure 1), which consists of a series of multi-scale encoder-  
851 decoder *hourglass* modules connected together in a feed-forward configuration (Figure  
852 2). The main novelties these researchers introduce include (1) stacking multiple hourglass  
853 networks together for repeated top-down-bottom-up inference, (2) using convolutional  
854 blocks based on the ResNet architecture (*He et al., 2016*) with residual connections between  
855 the input and output of each block, and (3) using residual connections between the encoder  
856 and decoder (similar to *Ronneberger et al. 2015*) with residual blocks in between. *Newell*  
857 *et al. (2016)* also apply a technique known as *intermediate supervision* (Figure 2) where the  
858 loss function used for model training is applied to the output of each hourglass as a way of  
859 improving optimization across the model's many layers. Recent work by *Jégou et al. (2017)*  
860 has further improved on this encoder-decoder design (see Appendix 3 Box 1 and Appendix  
861 3 Figure 1), but to the best of our knowledge, the model introduced by *Jégou et al. (2017)*  
862 has not been previously applied to pose estimation.

## 863 Appendix 6

### 864 Overparameterization and the limitations of LEAP

865 Overparameterization is a key limitation for many pose estimation methods, and addressing  
866 this problem is critical for high-performance applications. *Pereira et al. (2019)* approached  
867 this problem by designing their LEAP model after the model from *Badrinarayanan et al.*  
868 *(2015)*, which is a straightforward encoder-decoder design (Appendix 3 Figure 1; Appendix 3  
869 Box 1). They benchmarked their model on posture estimation tasks for laboratory animals  
870 and compared performance with the more-complex Stacked Hourglass model from *Newell*  
871 *et al. (2016)*. They found their smaller, simplified model achieved equal or better median ac-  
872 curacy with dramatic improvements in inference speed up to 185 Hz. However, *Pereira et al.*  
873 *(2019)* first rotationally and translationally aligned each image to improve performance, and  
874 their reported inference speeds do not include this computationally expensive preprocessing  
875 step. Additionally, rotationally and translationally aligning images is not always possible  
876 when the background is complex or highly-variable—such as in field settings—or the study  
877 animal has a non-rigid body. This limitation makes LEAP (*Pereira et al., 2019*) unsuitable in  
878 many cases. While their approach is simple and effective for a multitude of experimental  
879 setups, the LEAP model from *Pereira et al. (2019)* is also implicitly limited in the same ways  
880 as *Badrinarayanan et al.*'s SegNet model (see Appendix 3 Box 1 for details). LEAP cannot  
881 make predictions using multiple spatial scales and is not robust to data variance such as  
882 rotations (*Pereira et al., 2019*).

## 883 Appendix 7

### 884 Fitting linear models with Stan

885 We estimated the joint posterior  $p(\theta_\mu, \theta_\phi | X, y)$  for each model using the No-U-Turn Sampler  
886 (NUTS; *Hoffman and Gelman 2014*), a self-tuning variant of the Hamiltonian Monte Carlo  
887 (HMC) algorithm (*Duane et al., 1987*), implemented in Stan (*Carpenter et al., 2017*). We drew  
888 HMC samples using 4 independent Markov chains consisting of 1,000 warm-up iterations  
889 and 1,000 sampling iterations for a total of 4,000 sampling iterations. To speed up sampling,  
890 we randomly subsampled 20% of the data from each replicate when fitting each linear model,  
891 and we fit each model 5 times to ensure the results were consistent. All models converged  
892 without any signs of pathological behavior. We performed a posterior predictive check by  
893 visually inspecting predictive samples to assess model fit. For our priors we chose relatively  
894 uninformative distributions  $\theta_\mu \sim \text{Cauchy}(0, 5)$  and  $\theta_\phi \sim \text{Cauchy}(0, 10)$ , but we found that the  
895 choice of prior generally did not have an effect on the final result due to the large amount of  
896 data used to fit each model.

## 897 Appendix 8

### 898 Stacked DenseNet

899 Our Stacked DenseNet model consists of an initial 7×7 convolutional layer with stride 2,  
900 to efficiently downsample the input resolution—following *Newell et al. (2016)*—followed  
901 by a stack of densely-connected hourglasses with intermediate supervision (Appendix 5)  
902 applied at the output of each hourglass. We also include hyperparameters for the bottleneck  
903 and compression layers described by *Huang et al. (2017a)* to make the model as efficient  
904 as possible. These consist of applying a 1×1 convolution to inexpensively compress the  
905 number of feature maps before each 3×3 convolution as well as when downsampling and  
906 upsampling (see *Huang et al. 2017a* and Appendix 3 Figure 1 for details).

### 907 Model hyperparameters

908 For our Stacked Hourglass model we used a block size of 64 filters (64 filters per 3×3  
909 convolution) with a bottleneck factor of 2 (64/2 = 32 filters per 1×1 bottleneck block). For  
910 our Stacked DenseNet model we used a growth rate of 48 (48 filters per 3×3 convolution), a  
911 bottleneck factor of 1 (1×growth rate = 48 filters per 1×1 bottleneck block), and a compression  
912 factor of 0.5 (feature maps compressed with 1×1 convolution to 0.5 $m$  when upsampling  
913 and downsampling, where  $m$  is the number of feature maps). For our Stacked DenseNet  
914 model we also replaced the typical configuration of batch normalization and ReLU activations  
915 (*Goodfellow et al., 2016*) with the more recently developed self-normalizing SELU activation  
916 function (*Klambauer et al., 2017*), as we found this modification increased inference speed.  
917 For LEAP (*Pereira et al., 2019*) we used a 1× resolution output with integer-based global  
918 maxima because we wanted to compare our more complex models with LEAP in the original  
919 configuration described by *Pereira et al. (2019)*. Additionally, applying our subpixel maxima  
920 algorithm at high resolution reduces inference speed compared to integer-based maxima,  
921 so this would bias our speed comparisons.

### 922 Our implementation of DeeperCut

923 Because the original DeeperCut model from *Insafutdinov et al. (2016)* was not implemented  
924 in Keras (a requirement for our pose estimation framework), our implementation of this  
925 model does not exactly match the description in the paper. Implementing this model  
926 directly in our framework is important to ensure model training and data augmentation  
927 are identical when making comparisons. Nevertheless we assume our version is nearly  
928 identical in performance due to the very similar architecture and number of parameters—a  
929 ResNet-50 (*He et al., 2016*) encoder pretrained on the ImageNet database (*Deng et al., 2009*)  
930 with a matching ResNet decoder. Additionally, pretrained feature detectors in the Keras  
931 framework have a lower bound on input image size (224×224), so we were forced to add an  
932 upsampling layer before the encoder to double the resolution of the input when evaluating  
933 the model. Therefore speed comparisons between this model and the others may be biased.  
934 To account for this, our implementation of *Insafutdinov et al. (2016)* takes advantage of  
935 our fast subpixel maxima algorithm to increase speed, so our overall comparisons are  
936 reasonable regardless of these constraints. Our reported inference speeds for our datasets  
937 also match well with results from *Mathis and Warren (2018)* who evaluated the inference  
938 speed of DeeperCut (*Insafutdinov et al., 2016*) for multiple image sizes.

## 939 Appendix 9

### 940 **Depthwise-separable convolutions for memory-limited applications**

941 In an effort to maximize model efficiency, we also experimented with replacing 3×3 convo-  
942 lutions in our model implementations with 3×3 depthwise-separable convolutions —first  
943 introduced by *Chollet (2017)* and now commonly used in fast, efficient “mobile” CNNs (e.g.  
944 *Sandler et al. 2018*). In theory this modification should both reduce the memory footprint  
945 of the model and increase inference speed. However we found that, while this does dras-  
946 tically decrease the memory footprint of our already memory-efficient models, it slightly  
947 decreases accuracy and does not improve inference speed, so we opt for a full 3×3 con-  
948 volution instead. We suspect that this discrepancy between theory and application is due  
949 to inefficient implementations of depthwise-separable convolutions in many popular deep  
950 learning frameworks, which will hopefully improve in the near future. At the moment we in-  
951 clude this option as a hyperparameter for our Stacked DenseNet model, but we recommend  
952 using depthwise-separable convolutions only for applications that require a small memory  
953 footprint such as training on a lower-end GPU with limited memory or running inference on  
954 a mobile device.
